# Supplementary material
Source: publisher figshare collection journal article supplement (https://gsapubs.figshare.com/ndownloader/files/23297501)
Supplement: Supplementary file 1 [file 23297501]

## Sheet: Sheet1
Table DR1. U-Pb zircon geochronologic analyses by Laser-Ablation Multicollector ICP Mass Spectrometery
					Isotopic ratios						Apparent ages (Ma)
Analysis	U	206Pb	U/Th	207Pb*	±	206Pb*	±	error	206Pb*	±	207Pb*	±	206Pb*	±	Best age	±
	(ppm)	204Pb		235U	(%)	238U	(%)	corr.	238U	(Ma)	235U	(Ma)	207Pb*	(Ma)	(Ma)	(Ma)
Sample JV61504-1
standard	438.165	36281.8	4.58516	0.727157	7.55581	0.09083	2.4682	0.326662	560.444	13.2486	554.883	32.3113	532.111	156.577	560.444	13.2486
standard	359.193	39191.2	4.89526	0.759772	5.00367	0.0915846	1.9162	0.38296	564.902	10.3639	573.878	21.9388	609.571	99.9637	564.902	10.3639
standard	193.179	19768.8	4.99728	0.763259	8.44166	0.0938149	4.04707	0.479416	578.06	22.3763	575.889	37.1199	567.309	161.48	578.06	22.3763
standard	415.144	82057.5	4.66293	0.732351	5.41987	0.0907431	2.01566	0.371902	559.93	10.81	557.932	23.269	549.769	109.917	559.93	10.81
JV61504-1-01	477.843	5033.89	4.21999	0.17117	16.9207	0.019526	3.55607	0.210161	124.659	4.39039	160.434	25.1156	727.631	352.925	124.659	4.39039
JV61504-1-03	377.602	2709.79	7.02079	0.185865	21.0505	0.018134	4.01108	0.190546	115.852	4.60539	173.095	33.5128	1050.61	420.804	115.852	4.60539
JV61504-1-04	357.528	14703.4	5.0069	0.191906	27.9164	0.0214075	3.15425	0.112989	136.545	4.26168	178.254	45.6697	774.837	594.363	136.545	4.26168
JV61504-1-05	442.436	30178.4	2.18431	0.155478	23.8161	0.0199263	5.827	0.244666	127.19	7.33874	146.737	32.5504	475.57	516.893	127.19	7.33874
standard	313.707	119061	5.08383	0.760688	6.36264	0.0926368	4.05811	0.637802	571.113	22.1795	574.407	27.9191	587.442	106.381	571.113	22.1795
JV61504-1-06	511.242	23101.7	2.9491	0.148922	18.8889	0.0197057	2.97648	0.157579	125.796	3.70799	140.96	24.8652	404.49	420.871	125.796	3.70799
JV61504-1-07	1137.46	208157	5.51883	1.21034	2.17457	0.119586	1.78624	0.821423	728.183	12.2994	805.348	12.0913	1025.13	25.0924	728.183	12.2994
JV61504-1-08	165.673	6201.51	1.37397	0.201913	46.0224	0.0200363	8.51458	0.18501	127.885	10.7816	186.744	78.6607	1016.38	966.817	127.885	10.7816
standard	404.936	122706	4.82962	0.746825	6.23927	0.0891372	2.46732	0.395449	550.433	13.0173	566.381	27.0917	630.929	123.527	550.433	13.0173
JV61504-1-09	516.709	31835.2	7.32478	0.164147	10.6794	0.0195511	1.80197	0.168733	124.818	2.22755	154.326	15.2909	635.404	227.131	124.818	2.22755
JV61504-1-10	259.294	8652.94	1.63774	0.11189	38.891	0.0202881	4.63254	0.119116	129.477	5.93823	107.693	39.7587	-350.993	1029.72	129.477	5.93823
JV61504-1-11	819.738	4232.58	6.2301	0.119146	16.0068	0.019146	3.50177	0.218768	122.256	4.24079	114.298	17.3049	-48.4523	381.915	122.256	4.24079
standard	346.594	52921.8	4.93341	0.736884	7.69049	0.0915805	2.52781	0.328693	564.878	13.6713	560.585	33.141	543.177	158.957	564.878	13.6713
JV61504-1-12	502.401	7392.19	6.64263	0.168262	17.6423	0.0199795	2.36642	0.134133	127.526	2.98815	157.91	25.8062	642.042	378.524	127.526	2.98815
JV61504-1-13	865.567	12918.3	8.84436	0.138865	10.8476	0.0195713	2.50513	0.230938	124.946	3.09991	132.033	13.4311	261.489	242.966	124.946	3.09991
JV61504-1-14	779.847	16881.3	9.31713	0.143792	17.202	0.019232	2.6899	0.156371	122.8	3.27193	136.415	21.9616	380.432	384.458	122.8	3.27193
standard	312.212	3765.99	4.97444	0.723944	12.6417	0.0928824	3.08648	0.24415	572.562	16.91	552.993	53.9545	473.179	272.12	572.562	16.91
JV61504-1-15	614.43	7813.58	9.99615	0.156431	12.0106	0.0195016	2.15031	0.179035	124.506	2.65157	147.575	16.4982	536.41	259.414	124.506	2.65157
JV61504-1-16	189.335	5015.04	2.36945	0.260702	26.3619	0.020534	5.29616	0.200902	131.03	6.86951	235.233	55.4077	1469.04	498.779	131.03	6.86951
JV61504-1-17	389.39	776.845	1.2273	0.130479	28.3379	0.019347	5.3054	0.187219	123.527	6.49123	124.528	33.2225	143.657	664.425	123.527	6.49123
JV61504-1-18	508.081	14660.1	2.82597	0.160707	19.0083	0.0193976	6.21438	0.32693	123.848	7.62292	151.322	26.7292	606.708	391.378	123.848	7.62292
JV61504-1-19	404.68	24343.1	2.39476	0.137607	20.6664	0.0198298	3.09668	0.149841	126.58	3.88154	130.91	25.3883	210.208	477.952	126.58	3.88154
JV61504-1-20	207.316	13542.6	1.39851	0.218892	26.6497	0.0198301	5.49925	0.206354	126.582	6.89316	200.987	48.6315	1198.39	522.988	126.582	6.89316
standard	464.133	114605	4.64005	0.710214	5.42376	0.0890978	3.20902	0.591659	550.199	16.9235	544.873	22.874	522.639	95.9576	550.199	16.9235
JV61504-1-21	355.392	25957.5	1.74547	0.167731	22.4159	0.0189951	2.87022	0.128044	121.302	3.44907	157.448	32.7043	743.024	475.595	121.302	3.44907
JV61504-1-22	571.036	22479.5	1.61415	0.150786	14.1953	0.0196502	2.71883	0.19153	125.445	3.37766	142.606	18.8882	438.556	311.424	125.445	3.37766
JV61504-1-24	661.71	56738	9.38668	0.169886	11.6175	0.0206167	5.33135	0.458907	131.553	6.94245	159.32	17.1316	595.001	224.208	131.553	6.94245
JV61504-1-25	758.193	53793.2	8.31429	0.143656	12.1886	0.0187462	2.47612	0.20315	119.727	2.93721	136.295	15.547	435.565	266.594	119.727	2.93721
JV61504-1-26	511.242	22918.9	0.861069	0.166058	12.5433	0.0201254	2.98636	0.238084	128.449	3.79798	155.992	18.1396	597.874	264.748	128.449	3.79798
standard	341.896	112645	4.74649	0.735909	8.63671	0.0902334	2.24358	0.259773	556.917	11.9704	560.016	37.1937	572.606	181.69	556.917	11.9704
JV61504-1-27	673.242	65928.7	2.0581	0.153686	14.7367	0.0196015	3.26401	0.221489	125.137	4.04509	145.161	19.9357	486.269	318.678	125.137	4.04509
JV61504-1-28	662.778	6942.2	9.50543	0.153186	13.1205	0.0193059	4.3173	0.32905	123.268	5.2713	144.721	17.6988	512.555	273.192	123.268	5.2713
JV61504-1-29	607.212	42681.7	9.55764	0.167815	12.2809	0.0190715	2.98353	0.24294	121.785	3.5994	157.521	17.9211	735.588	253.045	121.785	3.5994
standard	241.142	48356	4.92799	0.749341	9.70172	0.0921627	2.53205	0.260989	568.315	13.7739	567.842	42.2215	565.926	204.341	568.315	13.7739
standard	295.47	22005.8	5.01463	0.746943	5.75937	0.0923956	1.63514	0.28391	569.689	8.9155	566.449	25.0093	553.44	120.588	569.689	8.9155
JV61504-1-30	145.856	17129.4	1.75569	0.212348	35.2861	0.0209749	7.10379	0.20132	133.814	9.4079	195.521	62.8358	1025.7	720.517	133.814	9.4079
JV61504-1-31	245.2	11916.1	2.53657	0.153833	38.3932	0.019656	5.74238	0.149568	125.481	7.13595	145.291	52.02	482.254	867.82	125.481	7.13595
JV61504-1-32	611.782	32853.6	6.2025	0.132041	19.9763	0.0195063	3.36347	0.168373	124.535	4.14849	125.93	23.663	152.326	465.188	124.535	4.14849
standard	180.921	24610.9	5.16102	0.79862	8.67487	0.0913582	3.51706	0.405431	563.565	18.9793	596.05	39.1299	721.666	168.514	563.565	18.9793
Sample JV61504-2
standard	448.774	674333	3.87603	0.734062	5.43493	0.0918753	3.62426	0.666846	566.619	19.6591	558.934	23.3651	527.746	88.7987	566.619	19.6591
standard	551.942	248122	4.84687	0.73341	3.36684	0.0897695	2.44827	0.727171	554.174	13.0009	558.553	14.4653	576.416	50.2429	554.174	13.0009
standard	498.061	734070	4.5143	0.743528	2.8677	0.0910072	2.0933	0.729957	561.491	11.2564	564.462	12.4181	576.435	42.6102	561.491	11.2564
standard	435.681	1.63058e+06	3.7615	0.73497	3.20834	0.0885354	2.58523	0.805782	546.869	13.5548	559.466	13.8011	611.024	41.0657	546.869	13.5548
JV61504-2-01	615.967	159340	5.64879	0.142517	12.0304	0.0188563	3.90169	0.324319	120.424	4.65494	135.283	15.2386	404.71	255.505	120.424	4.65494
JV61504-2-02	749.549	269964	5.79094	0.133542	9.63924	0.0192346	2.49705	0.259051	122.816	3.03776	127.276	11.5311	211.352	216.163	122.816	3.03776
standard	473.224	699636	4.50264	0.736349	3.24165	0.0913019	1.27578	0.39356	563.232	6.88065	560.273	13.9595	548.249	65.0991	563.232	6.88065
JV61504-2-04	849.517	350954	11.1036	0.142602	8.46956	0.0200522	3.2042	0.37832	127.986	4.06048	135.359	10.7334	266.72	180.115	127.986	4.06048
JV61504-2-06	800.413	297531	3.13164	0.132095	8.65109	0.0185954	2.63486	0.30457	118.772	3.10084	125.978	10.2499	264.163	189.419	118.772	3.10084
standard	214.173	12224.7	4.52828	0.754049	8.07689	0.0929803	3.76687	0.466377	573.139	20.6576	570.571	35.2701	560.33	155.904	573.139	20.6576
standard	260.307	7810.21	4.41869	0.733444	4.34318	0.0927029	2.07138	0.476927	571.503	11.3284	558.573	18.6614	506.208	84.0016	571.503	11.3284
JV61504-2-07	953.896	179147	4.19403	0.188519	4.99164	0.0256897	3.97267	0.795865	163.515	6.41424	175.365	8.03953	338.263	68.472	163.515	6.41424
JV61504-2-08	473.726	53793	5.88821	0.147391	11.3187	0.019965	2.46148	0.21747	127.435	3.10598	139.606	14.7644	351.845	250.317	127.435	3.10598
JV61504-2-09	570.61	235000	1.53888	0.136943	6.93155	0.0190158	3.15828	0.455639	121.433	3.79929	130.317	8.47758	295.493	140.951	121.433	3.79929
standard	521.186	418539	4.96737	0.732034	2.24653	0.0894143	1.63497	0.727775	552.072	8.65051	557.746	9.64117	580.951	33.4665	552.072	8.65051
JV61504-2-10	804.594	558810	9.65498	0.147368	6.54437	0.0196706	2.76832	0.423008	125.574	3.44265	139.585	8.53509	384.959	133.323	125.574	3.44265
JV61504-2-11	1126.78	355040	4.74692	0.135728	5.8423	0.019138	2.75851	0.472162	122.206	3.3393	129.232	7.08952	260.426	118.361	122.206	3.3393
JV61504-2-12	512.091	362579	5.49601	0.19462	9.04751	0.0262086	2.71659	0.300258	166.775	4.47249	180.564	14.9675	365.055	194.877	166.775	4.47249
standard	416.213	721401	4.50125	0.764038	3.53448	0.0928894	1	0.282927	572.603	5.47909	576.337	15.5452	591.07	73.5267	572.603	5.47909
standard	457.731	396167	4.45674	0.747211	4.05519	0.0915386	1.4932	0.368221	564.63	8.0724	566.605	17.6109	574.517	82.0049	564.63	8.0724
JV61504-2-13	1049.09	398071	10.1488	0.137979	5.52065	0.0194308	2.56203	0.464082	124.058	3.14801	131.242	6.79681	263.328	112.322	124.058	3.14801
JV61504-2-14	846.478	282482	10.1199	0.135261	10.3008	0.0194624	2.62657	0.254987	124.257	3.23245	128.814	12.4623	213.704	231.197	124.257	3.23245
JV61504-2-15	1427.23	857961	10.9442	0.131687	5.53824	0.0186787	1.98572	0.358547	119.3	2.34717	125.612	6.5437	246.771	119.112	119.3	2.34717
standard	408.855	693845	5.03748	0.742734	5.04453	0.0910815	2.25983	0.447976	561.93	12.1609	564	21.8333	572.335	98.1469	561.93	12.1609
JV61504-2-16	784.783	585236	10.5635	1.4661	7.98124	0.0777944	7.89649	0.989381	482.944	36.7426	916.525	48.2148	2185.58	20.1796	2185.58	20.1796
JV61504-2-17	782.384	913937	2.69512	0.69285	7.47344	0.0776828	7.04642	0.942862	482.277	32.7435	534.511	31.0675	764.134	52.4814	482.277	32.7435
JV61504-2-18	777.288	139160	8.5455	0.127509	8.29282	0.0183736	2.35822	0.284369	117.369	2.74276	121.857	9.52279	210.336	184.533	117.369	2.74276
standard	358.722	5806.23	5.18759	0.724233	4.8506	0.0923245	1.74753	0.360272	569.27	9.52158	553.163	20.6903	487.374	99.9042	569.27	9.52158
JV61504-2-19	407.461	44835.5	1.76467	0.142425	14.1043	0.0195328	3.16813	0.224622	124.703	3.91277	135.201	17.8559	323.773	313.418	124.703	3.91277
JV61504-2-20	390.552	29304.7	1.63616	0.154074	6.16254	0.0191123	2.4944	0.404768	122.043	3.0156	145.503	8.35401	547.311	123.182	122.043	3.0156
JV61504-2-21	855.367	99680.7	9.28176	0.133523	9.9652	0.0182591	2.23965	0.224747	116.644	2.58893	127.258	11.9196	330.331	220.716	116.644	2.58893
standard	346.68	9403.07	4.73712	0.747281	7.43618	0.0917729	5.30758	0.713751	566.014	28.7607	566.645	32.3033	569.159	113.42	566.014	28.7607
JV61504-2-22	521.14	102246	1.65308	0.141531	11.2887	0.0182877	2.57701	0.228282	116.825	2.98349	134.407	14.2124	457.479	244.463	116.825	2.98349
JV61504-2-23	1196.01	81636	10.2827	0.129583	5.91297	0.0187432	3.63829	0.615307	119.708	4.31513	123.723	6.88769	201.576	108.262	119.708	4.31513
JV61504-2-24	666.946	59609	1.05683	0.135425	8.49819	0.0182691	3.19343	0.375778	116.707	3.69343	128.961	10.2923	361.101	177.91	116.707	3.69343
standard	338.774	395294	4.97891	0.766011	3.63154	0.0913547	2.96967	0.817744	563.544	16.0248	577.472	15.9955	632.639	45.0141	563.544	16.0248
JV61504-2-25	523.425	41931.6	1.08333	0.135837	10.496	0.0191706	2.13245	0.203168	122.412	2.58575	129.329	12.7462	258.356	236.685	122.412	2.58575
JV61504-2-26	499.204	206824	3.04704	0.344578	9.07636	0.0429145	6.98966	0.770096	270.873	18.5409	300.635	23.6223	538.586	126.761	270.873	18.5409
JV61504-2-27	1185.66	102448	10.8556	0.133086	6.33937	0.0184511	2.09321	0.330192	117.86	2.44464	126.867	7.56057	299.091	136.598	117.86	2.44464
JV61504-2-28	281.649	10198	1.2622	0.170481	22.2886	0.0184282	3.48544	0.156378	117.714	4.06564	159.837	32.9745	840.715	463.591	117.714	4.06564
JV61504-2-30	271.024	10380.7	5.04472	0.187119	12.155	0.0251831	4.86674	0.40039	160.33	7.70663	174.168	19.4564	366.432	251.727	160.33	7.70663
standard	152.844	38060.7	4.78239	0.684589	9.7224	0.0884075	6.77538	0.696883	546.112	35.4775	529.544	40.1389	458.745	154.809	546.112	35.4775
JV61504-2-32	818.898	18120.2	12.9009	0.135895	5.71724	0.0192656	2.26639	0.396413	123.013	2.76152	129.381	6.94526	247.967	120.905	123.013	2.76152
JV61504-2-33	678.599	10636.6	10.6608	0.147711	10.9397	0.0210059	6.0547	0.553461	134.01	8.03016	139.888	14.297	240.805	210.403	134.01	8.03016
standard	304.133	40000	5.36446	0.76137	4.55763	0.0914497	2.37178	0.520398	564.105	12.8107	574.8	20.0065	617.294	84.0484	564.105	12.8107
Sample JV61504-3
standard	978.476	43322.5	5.17853	0.737041	1.41729	0.0915554	1	0.70557	564.73	5.407	560.677	6.10628	544.244	21.9501	564.73	5.407
standard	720.493	29401.7	4.61938	0.705411	2.39388	0.0887113	1.63948	0.684862	547.911	8.61174	542.018	10.0545	517.289	38.3023	547.911	8.61174
standard	975.708	39750	5.1664	0.742434	1.50624	0.0914929	1.12502	0.746906	564.36	6.07916	563.825	6.51674	561.647	21.8258	564.36	6.07916
standard	949.907	46552.5	5.04374	0.728629	2.47929	0.0908215	1.73512	0.699845	560.394	9.31285	555.748	10.6115	536.74	38.7561	560.394	9.31285
JV61504-3-01	1675.68	5234	3.84697	0.147661	6.32691	0.0196432	3.08205	0.487134	125.401	3.82757	139.844	8.26576	392.546	124.049	125.401	3.82757
JV61504-3-02	867.412	9192.81	1.45229	0.17976	6.2337	0.0258517	2.46989	0.396216	164.533	4.01236	167.854	9.64471	214.917	132.647	164.533	4.01236
JV61504-3-03	366.88	6778.37	3.01986	0.29715	10.4171	0.0383183	6.47513	0.621589	242.401	15.4043	264.171	24.235	461.95	181.145	242.401	15.4043
standard	913.843	36499.7	5.02528	0.715423	2.04119	0.089001	1.15727	0.566958	549.626	6.09705	547.961	8.64403	541.024	36.7713	549.626	6.09705
JV61504-3-05	300.34	12824.2	1.13488	0.729032	5.05767	0.0885838	2.52893	0.50002	547.156	13.2663	555.985	21.6566	592.285	94.9935	547.156	13.2663
standard	393.751	48553.2	4.50013	0.768947	3.60772	0.0936044	2.15541	0.597444	576.819	11.8928	579.159	15.925	588.328	62.7722	576.819	11.8928
standard	455.041	39466	4.69737	0.757827	2.23904	0.0924971	1	0.446619	570.289	5.45791	572.755	9.80166	582.538	43.5063	570.289	5.45791
JV61504-3-06	696.964	12261	12.3585	0.146442	5.41061	0.0211815	1.44036	0.266211	135.119	1.92595	138.766	7.01775	201.592	121.149	135.119	1.92595
standard	472.277	40416.7	4.73411	0.762365	2.93654	0.0934825	1.02605	0.34941	576.1	5.65467	575.374	12.899	572.484	59.8573	576.1	5.65467
JV61504-3-10	700.777	17715.6	11.5277	0.157005	9.01489	0.0226829	6.52721	0.724048	144.59	9.33263	148.079	12.422	204.301	144.406	144.59	9.33263
JV61504-3-11	322.224	6234.83	5.46353	0.186803	16.3198	0.0224606	2.37369	0.145448	143.188	3.36137	173.898	26.0882	615.05	350.786	143.188	3.36137
JV61504-3-12	637.789	8223.45	9.17029	0.154825	9.94845	0.0211077	2.83893	0.285364	134.653	3.78304	146.163	13.5436	337.247	216.446	134.653	3.78304
JV61504-3-13	650.298	8932.51	7.34956	0.14548	8.3206	0.0200486	3.13692	0.377007	127.963	3.97452	137.914	10.7304	312.79	175.587	127.963	3.97452
standard	451.359	36385.6	4.74671	0.753559	2.8145	0.0906093	2.00921	0.71388	559.14	10.7609	570.287	12.2814	614.962	42.5684	559.14	10.7609
JV61504-3-15	837.146	14392.8	11.6555	0.141969	6.2218	0.0202135	2.56721	0.412616	129.005	3.27892	134.796	7.85404	238.047	130.796	129.005	3.27892
JV61504-3-16	585.848	12337.5	10.4508	0.161889	8.59634	0.0215905	1.70255	0.198055	137.7	2.31955	152.355	12.1623	386.87	189.527	137.7	2.31955
JV61504-3-17	606.008	12631.1	9.78089	0.157728	10.3334	0.0215135	2.46929	0.238961	137.214	3.3524	148.712	14.2957	336.194	227.87	137.214	3.3524
standard	388.346	37789	4.3363	0.704906	3.67418	0.0891937	1.88308	0.512517	550.767	9.94067	541.717	15.426	503.793	69.4441	550.767	9.94067
JV61504-3-18	596.764	12186.9	11.7824	0.158943	8.12734	0.0220522	4.04612	0.497841	140.613	5.62777	149.777	11.3181	297.402	161.002	140.613	5.62777
JV61504-3-19	654.581	11531.5	12.0878	0.142174	10.0034	0.0202386	2.37635	0.237553	129.164	3.03884	134.979	12.6442	238.513	224.537	129.164	3.03884
JV61504-3-20	600.55	13521.4	10.394	0.156022	5.51644	0.0218348	2.70231	0.489865	139.241	3.72238	147.215	7.5599	277.654	110.178	139.241	3.72238
JV61504-3-21	816.959	11490.2	10.6585	0.152351	8.28056	0.0206032	4.37361	0.528178	131.467	5.69163	143.986	11.1165	355.527	158.955	131.467	5.69163
standard	437.31	51073	4.62888	0.726084	3.13193	0.0912193	1.37806	0.440005	562.744	7.42613	554.252	13.378	519.497	61.7378	562.744	7.42613
JV61504-3-22	495.78	10756.2	9.53408	0.156801	12.0225	0.0215464	3.5314	0.293732	137.422	4.80155	147.899	16.5483	319.352	261.948	137.422	4.80155
JV61504-3-23	531.817	10193.3	11.6842	0.166185	9.06905	0.0207873	3.93823	0.43425	132.63	5.16991	156.103	13.1232	529.055	179.274	132.63	5.16991
JV61504-3-24	849.289	17307.3	14.3703	0.138807	8.4636	0.0190877	2.4317	0.287313	121.888	2.93609	131.981	10.4752	317.693	184.566	121.888	2.93609
JV61504-3-25	568.247	13318.2	11.7023	0.145888	13.8546	0.0204162	3.42638	0.247311	130.286	4.41928	138.274	17.912	277.692	308.574	130.286	4.41928
JV61504-3-26	714.382	12240.6	8.79143	0.158476	8.52336	0.0209033	3.25165	0.381499	133.362	4.29193	149.368	11.8396	411.602	176.416	133.362	4.29193
JV61504-3-27	878.328	14728.1	13.026	0.147373	5.96366	0.0205826	2.65419	0.445061	131.337	3.45067	139.589	7.77792	282.286	122.26	131.337	3.45067
JV61504-3-28	665.862	13800	9.96587	0.148781	11.0935	0.0209711	4.13353	0.37261	133.79	5.47327	140.835	14.5894	261.238	236.968	133.79	5.47327
JV61504-3-29	842.656	15484.4	11.8694	0.148738	7.34348	0.0206918	4.37633	0.595948	132.027	5.71917	140.797	9.65488	291.28	134.802	132.027	5.71917
standard	325.541	29125	4.36621	0.787813	23.4473	0.0929259	23.2205	0.990324	572.818	127.289	589.93	105.288	656.304	69.809	572.818	127.289
Sample JV61504-4
JV61504-4-01	409.559	28157.9	11.7638	0.148399	33.3783	0.0211673	4.95929	0.148578	135.029	6.62685	140.498	43.823	233.874	780.864	135.029	6.62685
JV61504-4-02	584.481	123833	14.1364	0.154684	15.285	0.020561	4.42531	0.289519	131.201	5.74735	146.039	20.7941	394.346	329.698	131.201	5.74735
JV61504-4-03	603.545	78917.1	7.14926	0.185669	15.9906	0.0201046	2.92501	0.18292	128.317	3.71617	172.927	25.4309	837.127	329.358	128.317	3.71617
standard	286.126	165706	4.94881	0.763823	9.34763	0.0924161	4.39434	0.470102	569.811	23.9648	576.213	41.125	601.521	178.855	569.811	23.9648
JV61504-4-04	331.129	38394.1	0.977119	0.190732	23.5715	0.0202301	4.47642	0.189908	129.11	5.722	177.253	38.356	880.052	484.964	129.11	5.722
JV61504-4-05	441.07	27307.7	1.71266	0.210399	23.1296	0.0206949	5.95286	0.257369	132.046	7.78059	193.888	40.8459	1034.23	457.07	132.046	7.78059
JV61504-4-06	692.464	45289	7.98454	0.147887	18.3997	0.0201705	3.25099	0.176687	128.734	4.14361	140.045	24.0743	336.27	413.36	128.734	4.14361
standard	341.053	245678	5.00506	0.745506	6.59552	0.0910095	2.27682	0.345207	561.505	12.2435	565.613	28.6104	582.151	134.538	561.505	12.2435
JV61504-4-07	453.649	62747.4	3.85588	0.17923	19.9649	0.0214664	4.41474	0.221125	136.917	5.98078	167.398	30.8207	623.448	423.588	136.917	5.98078
JV61504-4-08	523.069	43884.3	9.95662	0.173095	16.5931	0.0217868	3.02236	0.182145	138.939	4.1543	162.102	24.8655	515.406	360.502	138.939	4.1543
JV61504-4-09	531.774	94750.9	10.244	0.152017	7.68038	0.0208657	3.7881	0.493217	133.125	4.99119	143.692	10.2911	321.887	151.928	133.125	4.99119
standard	299.661	8101.96	4.96044	0.708643	12.1835	0.0925456	7.79188	0.639545	570.574	42.5484	543.94	51.3509	433.827	209.029	570.574	42.5484
JV61504-4-10	350.149	68681.5	4.74405	0.387888	12.4313	0.0354273	8.58567	0.690647	224.427	18.937	332.825	35.2919	1182.32	178.034	224.427	18.937
JV61504-4-11	673.618	12354.3	8.05259	0.160142	12.5037	0.0200118	2.16001	0.17275	127.73	2.73184	150.828	17.527	531.212	270.685	127.73	2.73184
JV61504-4-12	545.397	54053.8	8.59115	0.160891	13.2602	0.0205683	3.60416	0.271802	131.247	4.68252	151.483	18.6625	481.125	282.955	131.247	4.68252
standard	388.058	190056	4.71198	0.734096	5.29733	0.0902811	2.53612	0.478755	557.2	13.5378	558.954	22.774	566.083	101.318	557.2	13.5378
JV61504-4-13	764.235	17684.4	0.732719	0.189898	11.2995	0.0195406	5.82372	0.515396	124.752	7.19535	176.542	18.3125	942.423	198.836	124.752	7.19535
JV61504-4-14	608.724	65761.5	5.51381	0.156992	10.5788	0.0201421	2.97767	0.281476	128.554	3.79	148.067	14.5762	473.19	225.087	128.554	3.79
JV61504-4-15	278.117	4688.84	4.22436	0.320022	11.6376	0.0360041	3.87301	0.3328	228.017	8.67677	281.919	28.6556	756.914	232.186	228.017	8.67677
standard	398.33	95300.6	4.64442	0.742341	5.22659	0.0914876	3.06847	0.587088	564.329	16.58	563.771	22.6147	561.499	92.2401	564.329	16.58
JV61504-4-16	351.977	13573.1	6.74303	0.189029	18.455	0.0209839	5.7225	0.310079	133.871	7.58177	175.801	29.7992	785.108	371.169	133.871	7.58177
JV61504-4-17	324.47	26933.8	5.86024	0.232273	25.1968	0.0232763	4.27559	0.169688	148.329	6.26953	212.073	48.2607	996.461	512.19	148.329	6.26953
JV61504-4-18	385.49	2500.64	0.987279	0.248002	12.5152	0.0209881	6.21804	0.496838	133.898	8.23994	224.952	25.258	1331.41	210.759	133.898	8.23994
standard	403.901	93955.6	4.95929	0.779859	4.06565	0.0908913	1.68409	0.414224	560.806	9.04533	585.403	18.0899	681.968	79.0597	560.806	9.04533
JV61504-4-19	397.634	22665.8	5.44407	0.195174	22.6321	0.0289515	3.16796	0.139977	183.983	5.74611	181.034	37.5442	142.696	531.673	183.983	5.74611
JV61504-4-20	274.2	6138.89	1.69739	0.262995	18.8349	0.0223509	6.81291	0.361717	142.497	9.60167	237.077	39.844	1323.25	342.757	142.497	9.60167
JV61504-4-21	454.127	14475	3.95189	0.18141	13.6512	0.0210955	6.18482	0.453061	134.576	8.23699	169.273	21.2875	686.773	260.603	134.576	8.23699
standard	378.091	18404	4.81853	0.674134	3.84172	0.0897384	1.3487	0.351067	553.99	7.15963	523.223	15.7089	391.077	80.7473	553.99	7.15963
JV61504-4-22	55.1882	5278.51	2.77598	1.59688	13.7485	0.120059	6.91632	0.50306	730.904	47.792	968.99	86.0485	1556.85	223.766	1556.85	223.766
JV61504-4-23	405.468	15625.9	3.96412	0.130764	23.8725	0.0204457	3.99889	0.16751	130.472	5.16499	124.784	28.0385	17.6942	572.155	130.472	5.16499
JV61504-4-24	140.495	41583.4	2.00803	2.12309	6.10843	0.174223	4.65677	0.762352	1035.34	44.5416	1156.34	42.1884	1390.77	75.8859	1390.77	75.8859
standard	285.037	34699.5	5.31397	0.793751	6.35104	0.0935732	2.43632	0.38361	576.635	13.4387	593.297	28.5437	657.517	125.874	576.635	13.4387
standard	278.596	23921.7	5.2934	0.795718	7.66836	0.0932717	3.60063	0.469543	574.857	19.8025	594.41	34.516	669.737	145.047	574.857	19.8025
JV61504-4-25	430.32	20666.9	3.98271	0.143166	11.6706	0.0209893	2.55762	0.21915	133.905	3.38946	135.86	14.8417	170.14	266.602	133.905	3.38946
JV61504-4-26	630.791	10738.2	2.98269	0.169856	16.3387	0.0203507	2.91068	0.178147	129.872	3.74233	159.294	24.0922	622.704	348.827	129.872	3.74233
JV61504-4-27	397.59	34839.9	8.24655	0.17115	15.37	0.0215404	3.3815	0.220007	137.384	4.59648	160.416	22.8108	515.567	330.966	137.384	4.59648
standard	387.623	78682.3	4.95213	0.663502	5.74447	0.0908975	2.08108	0.362275	560.843	11.1783	516.754	23.2688	326.23	121.617	560.843	11.1783
JV61504-4-28	568.116	10391.5	9.72913	0.152341	15.772	0.0203586	4.10743	0.260426	129.922	5.28304	143.977	21.1746	382.292	344.022	129.922	5.28304
JV61504-4-29	297.006	17940.8	3.50025	0.129933	31.3705	0.0219794	4.50849	0.143718	140.153	6.25061	124.038	36.6443	-174.869	790.161	140.153	6.25061
JV61504-4-30	749.785	920.554	9.88211	0.102217	31.7197	0.0190448	3.46783	0.109327	121.616	4.17791	98.8203	29.8771	-421.697	843.316	121.616	4.17791
standard	392.324	46327.1	4.90977	0.749871	4.12271	0.0905023	1.37321	0.333083	558.507	7.34661	568.15	17.9407	606.914	84.0936	558.507	7.34661
Sample JV62204-1
JV62204-1-01	258.251	31891.6	12.7438	0.170295	18.7927	0.0223878	2.68848	0.14306	142.729	3.79508	159.675	27.7737	419.028	418.589	142.729	3.79508
JV62204-1-02	222.033	35014.6	4.29312	0.506675	6.4182	0.0649482	2.57388	0.401028	405.648	10.1192	416.211	21.919	475.169	130.126	405.648	10.1192
JV62204-1-03	187.439	23943.2	7.28223	1.39949	6.69244	0.0671485	5.30198	0.792234	418.953	21.5065	888.721	39.6539	2359.06	69.7667	2359.06	69.7667
standard	416.076	76685.6	4.50337	0.74589	3.11115	0.0916954	1.66403	0.53486	565.556	9.01001	565.837	13.4969	566.943	57.2418	565.556	9.01001
JV62204-1-04	316.381	23385.9	6.15165	0.188821	9.83116	0.0215865	4.1893	0.426125	137.675	5.70647	175.623	15.8564	723.009	189.028	137.675	5.70647
JV62204-1-05	389.273	235427	3.68469	1.69734	3.22967	0.164241	2.78755	0.863106	980.3	25.3502	1007.53	20.6387	1067.21	32.7916	1067.21	32.7916
JV62204-1-06	294.719	33447	1.72155	0.170839	19.2179	0.0213688	2.66593	0.138721	136.301	3.59554	160.147	28.4801	529.126	420.474	136.301	3.59554
standard	468.059	156182	4.25448	0.742488	4.0779	0.0905132	2.53944	0.622731	558.571	13.5874	563.857	17.6454	585.218	69.2697	558.571	13.5874
JV62204-1-07	217.258	54230.2	3.01817	0.193928	24.461	0.0204875	4.35375	0.177988	130.736	5.6346	179.975	40.3641	888.271	504.308	130.736	5.6346
JV62204-1-08	75.0165	84238.7	1.0098	1.74191	8.34722	0.161031	6.86307	0.822199	962.501	61.3641	1024.17	53.8955	1158.38	94.2842	1158.38	94.2842
JV62204-1-09	337.654	50166.9	4.40565	0.181425	13.2432	0.0220639	3.07311	0.232053	140.687	4.27663	169.286	20.6525	590.4	280.404	140.687	4.27663
standard	435.133	19067.6	4.62077	0.746019	3.33139	0.0925467	1.26622	0.380087	570.581	6.91429	565.912	14.4539	547.17	67.3261	570.581	6.91429
JV62204-1-10	263.026	42839.6	7.79138	0.143699	23.624	0.0202668	4.64535	0.196637	129.342	5.94851	136.333	30.1475	259.864	538.447	129.342	5.94851
JV62204-1-11	349.765	51474.1	9.81618	0.145573	15.751	0.0208044	3.43585	0.218136	132.738	4.51403	137.996	20.326	229.41	356.869	132.738	4.51403
JV62204-1-12	58.9987	7826.87	2.22171	0.572576	142.859	0.0347844	6.44575	0.0451197	220.423	13.9678	459.679	585.415	1947.02	78.3756	1947.02	78.3756
standard	424.027	147070	5.16983	0.738531	4.17656	0.0910904	2.14871	0.514469	561.983	11.564	561.548	18.0169	559.768	78.0908	561.983	11.564
JV62204-1-13	386.074	103989	6.85982	0.193898	10.8277	0.0243663	3.45831	0.319395	155.192	5.30293	179.949	17.8573	518.905	225.75	155.192	5.30293
JV62204-1-14	402.274	43391.8	3.38468	0.183101	10.1479	0.0222703	2.47237	0.243633	141.988	3.4721	170.726	15.9482	590.15	213.911	141.988	3.4721
JV62204-1-15	274.406	254642	3.56698	3.79702	4.25135	0.255364	4.13199	0.971925	1466.08	54.1848	1592.12	34.1816	1763.23	18.2818	1763.23	18.2818
JV62204-1-16	242.621	39044.8	1.15881	0.370793	10.4013	0.0497783	3.43079	0.329843	313.16	10.4871	320.241	28.5754	372.05	221.562	313.16	10.4871
JV62204-1-17	248.882	43607.7	7.41459	0.178058	17.9462	0.0231523	5.34424	0.297792	147.548	7.79577	166.388	27.5489	443.53	383.473	147.548	7.79577
JV62204-1-18	212.711	8372.48	0.970116	0.155057	22.7852	0.0244338	4.11976	0.180809	155.617	6.33428	146.367	31.0675	-1.05242	546.096	155.617	6.33428
standard	405.747	18425.1	4.81997	0.741063	3.94944	0.0913036	2.27275	0.575461	563.242	12.2578	563.026	17.0705	562.131	70.3946	563.242	12.2578
JV62204-1-19	236.909	33613.6	3.71495	0.165476	27.9794	0.022554	3.06189	0.109434	143.777	4.35357	155.485	40.3578	337.82	641.123	143.777	4.35357
JV62204-1-22	607.604	52818.5	10.3713	0.200972	11.2265	0.0257345	9.47515	0.844	163.796	15.3245	185.949	19.0778	477.506	133.215	163.796	15.3245
JV62204-1-24	341.608	127910	7.7916	1.45308	6.20157	0.124385	5.99416	0.966555	755.753	42.747	911.148	37.3168	1309.27	30.8693	1309.27	30.8693
standard	419.366	15812.1	4.6876	0.738847	4.39691	0.0906498	1.69176	0.384761	559.379	9.06439	561.732	18.9723	571.255	88.3262	559.379	9.06439
standard	469.499	104448	4.65128	0.747584	3.10932	0.0909126	1	0.321614	560.932	5.3722	566.822	13.5065	590.505	63.8572	560.932	5.3722
JV62204-1-25	471.715	25238	2.46937	0.335082	5.58442	0.0447044	3.64754	0.653164	281.927	10.0618	293.438	14.2324	386.079	95.0157	281.927	10.0618
JV62204-1-26	459.308	7924.16	9.04042	0.169442	11.3927	0.0212045	7.448	0.653755	135.264	9.96951	158.935	16.7625	528.051	189.248	135.264	9.96951
JV62204-1-27	553.655	31952.1	12.573	0.166073	10.4904	0.0206806	2.95462	0.281651	131.956	3.85917	156.005	15.1714	538.849	220.695	131.956	3.85917
standard	212.802	161699	4.62091	0.740414	6.48221	0.0927922	3.89605	0.601037	572.03	21.3264	562.647	28.0082	524.865	113.669	572.03	21.3264
JV62204-1-28	470.916	12475.5	6.57712	0.164822	11.7634	0.0205627	2.73241	0.23228	131.211	3.54899	154.915	16.9028	534.816	251.203	131.211	3.54899
JV62204-1-29	827.101	2105.53	11.2061	0.123814	14.826	0.018922	3.26033	0.219906	120.84	3.90307	118.524	16.587	72.2668	345.421	120.84	3.90307
JV62204-1-30	501.238	4476.46	5.41948	0.133179	13.2199	0.0217877	3.43133	0.259558	138.945	4.71663	126.95	15.7772	-92.1721	314.264	138.945	4.71663
standard	358.608	45532.5	5.05261	0.760598	3.18624	0.0916308	1.63872	0.514312	565.175	8.86725	574.355	13.9775	610.832	59.064	565.175	8.86725
JV62204-1-31	552.81	30323.1	6.28378	0.153896	10.4489	0.0200546	4.40964	0.42202	128.001	5.58871	145.346	14.151	438.646	211.243	128.001	5.58871
JV62204-1-32	302.397	1433.17	8.13592	0.119862	24.9009	0.0210023	4.19473	0.168457	133.988	5.56242	114.947	27.0684	-263.406	630.626	133.988	5.56242
JV62204-1-33	289.944	449.415	7.13696	0.0848783	53.555	0.0204403	5.48158	0.102354	130.438	7.07823	82.7211	42.5696	-1147	1735.3	130.438	7.07823
standard	457.388	145267	4.63494	0.738849	3.44946	0.0912941	2.19461	0.636219	563.186	11.8353	561.734	14.8836	555.836	58.0584	563.186	11.8353
JV62204-1-34	344.669	12233.3	1.41206	0.178786	14.7655	0.0204068	2.85367	0.193266	130.226	3.67895	167.015	22.7432	726.388	308.671	130.226	3.67895
JV62204-1-35	323.899	8379.65	5.98488	0.68122	10.7649	0.0528047	6.7073	0.623072	331.718	21.6866	527.512	44.3178	1499.33	159.492	331.718	21.6866
JV62204-1-36	526.121	8013.44	8.63365	0.165098	8.79247	0.0215686	3.84795	0.437642	137.562	5.23723	155.156	12.6515	433.052	176.361	137.562	5.23723
standard	314.05	79559.1	4.33392	0.755533	4.82564	0.0930852	3.25497	0.674516	573.758	17.8687	571.43	21.0907	562.16	77.6478	573.758	17.8687
standard	333.29	2148.8	4.52742	0.719109	10.5077	0.090767	1.7379	0.165393	560.071	9.32266	550.141	44.659	509.211	228.394	560.071	9.32266
Sample JV62204-2
JV62204-2-01	345.87	8815.57	2.12887	0.169757	18.0604	0.0223331	6.22735	0.344807	142.384	8.76958	159.208	26.6188	417.421	381.129	142.384	8.76958
JV62204-2-03	909.946	15763.6	2.86711	0.151549	9.33056	0.0222708	5.70317	0.611235	141.992	8.0095	143.279	12.469	164.619	172.793	141.992	8.0095
JV62204-2-04	695.967	13876.7	1.30097	0.157822	8.22685	0.0212141	3.4719	0.42202	135.325	4.64937	148.795	11.387	369.204	168.225	135.325	4.64937
standard	341.472	33479	4.64031	0.785756	8.81884	0.094092	3.55172	0.402742	579.692	19.6905	588.762	39.4208	623.862	174.328	579.692	19.6905
JV62204-2-05	644.812	6842.07	3.63452	0.169635	12.5064	0.0210384	2.50493	0.200293	134.215	3.32725	159.102	18.4193	547.74	268.543	134.215	3.32725
JV62204-2-06	791.47	16430	5.19868	0.151889	5.11737	0.021451	2.28651	0.446813	136.82	3.09543	143.578	6.85171	256.741	105.273	136.82	3.09543
JV62204-2-07	534.027	7934.71	2.27111	0.163941	6.69545	0.0227323	3.54789	0.529895	144.901	5.08357	154.147	9.57587	298.74	129.62	144.901	5.08357
JV62204-2-08	645.009	12565	7.56425	0.148532	6.86981	0.0204955	3.46819	0.504845	130.787	4.49023	140.615	9.02119	309.859	135.109	130.787	4.49023
standard	317.074	37838.3	4.2722	0.714835	5.60015	0.0882404	3.42359	0.61134	545.122	17.8955	547.613	23.7078	557.973	96.6764	545.122	17.8955
standard	415.305	38185.1	4.29117	0.736422	4.18044	0.0916638	1.30484	0.312129	565.37	7.0629	560.316	18.004	539.82	86.8958	565.37	7.0629
JV62204-2-09	323.61	5326.67	2.88974	0.194541	9.92833	0.0221278	1.84227	0.185557	141.09	2.57103	180.497	16.4193	733.774	207.062	141.09	2.57103
JV62204-2-10	229.532	4183.05	3.03759	0.183556	12.6009	0.0215153	2.6576	0.210906	137.226	3.60837	171.116	19.8457	669.792	264.523	137.226	3.60837
JV62204-2-11	1405.47	964.412	3.38749	0.248365	18.4621	0.0227098	8.18267	0.443215	144.759	11.7132	225.247	37.3125	1180.08	329.4	144.759	11.7132
JV62204-2-12	827.637	19045.4	3.44183	0.157402	8.19856	0.02445	4.15323	0.506581	155.719	6.38987	148.427	11.3217	33.4188	169.467	155.719	6.38987
standard	461.005	45143.8	4.77042	0.751247	1.96148	0.0926474	1.42008	0.723982	571.175	7.76217	568.948	8.54397	560.036	29.4939	571.175	7.76217
JV62204-2-13	352.578	5544.36	2.72603	0.189972	15.0828	0.0239659	6.58422	0.436537	152.672	9.93415	176.606	24.454	510.375	299.529	152.672	9.93415
JV62204-2-14	398.966	6195.63	2.86993	0.171335	9.92205	0.0222671	3.72768	0.375697	141.968	5.23428	160.577	14.7376	444.641	204.815	141.968	5.23428
JV62204-2-16	779.848	4880.43	3.51426	0.164604	13.0651	0.0206446	4.85811	0.371839	131.729	6.33459	154.725	18.7523	523.201	266.901	131.729	6.33459
standard	488.941	40131.2	4.85246	0.745911	1.78746	0.0918148	1.3347	0.746706	566.261	7.23547	565.849	7.75423	564.173	25.899	566.261	7.23547
JV62204-2-17	477.172	5933.92	2.8678	0.166918	10.9706	0.0222532	4.10621	0.374291	141.88	5.76226	156.741	15.9353	387.685	228.958	141.88	5.76226
JV62204-2-18	563.019	802.529	3.4685	0.293354	22.5729	0.0251251	8.71448	0.386059	159.966	13.7686	261.196	52.0321	1308.21	408.605	159.966	13.7686
JV62204-2-19	449.654	7162.87	2.6549	0.174053	14.5119	0.0229002	9.72035	0.669819	145.959	14.0284	162.93	21.8482	417.237	241.329	145.959	14.0284
standard	464.322	70984.3	4.74152	0.735005	2.61605	0.0908328	1.42751	0.545674	560.461	7.66271	559.486	11.2534	555.505	47.8263	560.461	7.66271
standard	465.968	37473.8	4.76251	0.73042	2.83546	0.092536	1	0.352677	570.518	5.46001	556.799	12.1533	501.082	58.427	570.518	5.46001
JV62204-2-25	488.793	4293.75	2.18267	0.167527	16.7771	0.021559	2.86969	0.171048	137.501	3.90408	157.271	24.4484	466.484	368.364	137.501	3.90408
JV62204-2-26	242.529	3707.78	2.33337	0.188146	22.977	0.0222068	3.9165	0.170453	141.588	5.48482	175.046	36.9607	654.942	491.551	141.588	5.48482
JV62204-2-27	752.035	2139.2	4.89637	0.221632	22.7751	0.0235001	4.64529	0.203964	149.738	6.87563	203.267	41.9787	880.709	466.744	149.738	6.87563
JV62204-2-28	497.417	10263.6	2.92062	0.172281	12.0305	0.0216778	4.05817	0.337324	138.251	5.55074	161.397	17.9541	516.065	249.43	138.251	5.55074
standard	342.013	43431.4	4.46189	0.749457	6.79809	0.0903532	2.89305	0.425568	557.626	15.4544	567.909	29.579	609.283	133.099	557.626	15.4544
JV62204-2-30	877.268	1205.92	3.67051	0.229576	7.95179	0.0224299	4.57476	0.575312	142.995	6.46966	209.849	15.0764	1047.79	131.267	142.995	6.46966
JV62204-2-31	761.028	2935.02	2.60826	0.184809	10.9561	0.0213297	3.46978	0.316699	136.054	4.67133	172.19	17.3541	702.8	221.746	136.054	4.67133
JV62204-2-32	479.997	10000.5	3.74603	0.159745	9.78826	0.0228577	3.32269	0.339456	145.691	4.78658	150.48	13.6907	226.577	213.168	145.691	4.78658
standard	370.367	28617.7	4.32744	0.755784	4.56751	0.0914648	3.63108	0.794979	564.194	19.6155	571.575	19.9661	601.019	59.9906	564.194	19.6155
standard	455.747	38502.5	4.71322	0.731407	2.94183	0.0912997	2.72252	0.925451	563.219	14.683	557.378	12.6191	533.578	24.405	563.219	14.683
Sample JV61204-1
standard	510.915	29384	4.80048	0.741156	2.59673	0.0921939	1.63	0.627713	568.499	8.86969	563.08	11.224	541.224	44.2053	568.499	8.86969
standard	515.013	26228	4.05131	0.754814	2.28668	0.0918149	1.43	0.625361	566.262	7.75209	571.014	9.98754	589.96	38.7005	566.262	7.75209
standard	563.687	33378	3.80964	0.749318	2.86489	0.0921785	1.5	0.523581	568.408	8.16104	567.829	12.4611	565.486	53.1613	568.408	8.16104
standard	474.879	34694	5.2119	0.752917	2.67335	0.0918561	2.02	0.755607	566.505	10.955	569.916	11.6598	583.526	38.0214	566.505	10.955
standard	477.535	29166	4.7782	0.718148	3.18102	0.0890847	1.41	0.443255	550.121	7.43496	549.573	13.5013	547.281	62.2989	550.121	7.43496
JV61204-1-01C	248.498	2166	1.19554	0.0803998	16.643	0.0124794	2.15	0.129184	79.9498	1.70831	78.5207	12.5763	35.2209	397.445	79.9498	1.70831
JV61204-1-01R	422.222	4012	2.20354	0.087186	8.91149	0.0119092	2.24	0.251361	76.3183	1.69945	84.8786	7.25655	332.878	195.883	76.3183	1.69945
JV61204-1-02C	343.831	2476	1.37993	0.089019	16.2795	0.0125362	1.6	0.0982833	80.311	1.27701	86.5891	13.5127	263.301	374.042	80.311	1.27701
JV61204-1-03	164.131	1536	2.09266	0.0762097	194.78	0.0132083	2.2	0.0112948	84.5888	1.8488	74.5751	140.95	-235.778	2266.49	84.5888	1.8488
JV61204-1-04	529.872	3844	1.65799	0.0741997	12.5604	0.0123119	1.62	0.128977	78.8829	1.27012	72.6769	8.80971	-127.022	308.623	78.8829	1.27012
standard	594.732	31250	4.94683	0.748073	2.53514	0.0916732	1.73	0.682407	565.425	9.36514	567.106	11.0163	573.831	40.3011	565.425	9.36514
JV61204-1-05	483.03	3854	2.36783	0.0798868	8.03886	0.012041	1.09	0.135591	77.1577	0.836006	78.0385	6.03846	105.07	188.456	77.1577	0.836006
JV61204-1-06	1490.53	9424	1.91481	0.0842273	3.18195	0.0125286	1.67	0.524835	80.2627	1.33208	82.1116	2.5099	136.207	63.65	80.2627	1.33208
JV61204-1-07	342.297	2122	1.06735	0.0804475	15.3778	0.0129885	0.84	0.0546241	83.1904	0.69431	78.5656	11.6266	-59.9506	376.217	83.1904	0.69431
JV61204-1-08	550.752	3524	0.969681	0.0842075	8.02809	0.0130084	1.54	0.191826	83.317	1.27483	82.093	6.3312	46.6001	188.484	83.317	1.27483
JV61204-1-09	597.273	4574	1.88995	0.0905281	7.18944	0.0126877	2.06	0.286531	81.2755	1.66377	87.9952	6.06006	274.303	157.979	81.2755	1.66377
standard	554.094	34510	3.88704	0.735586	4.37505	0.0914296	2.47	0.564565	563.986	13.3385	559.827	18.83	542.932	78.9634	563.986	13.3385
JV61204-1-10	518.035	3342	0.903349	0.0759563	13.4762	0.0123208	4.76	0.353216	78.9396	3.73461	74.3361	9.66004	-71.3385	309.073	78.9396	3.73461
JV61204-1-11	708.335	3586	0.673093	0.0945119	5.18819	0.0129954	1.83	0.352724	83.2338	1.51339	91.6977	4.54899	317.904	110.423	83.2338	1.51339
JV61204-1-12	280.275	2204	0.899433	0.0823293	15.3327	0.0122234	6.64	0.433062	78.3197	5.16896	80.3325	11.843	140.587	325.8	78.3197	5.16896
JV61204-1-13	274.14	1670	0.976162	0.0783176	14.0336	0.0117769	4.34	0.309259	75.475	3.25651	76.562	10.3496	110.605	316.246	75.475	3.25651
JV61204-1-14	383.896	2798	1.71735	0.0927137	7.85292	0.0124791	2.5	0.318353	79.9475	1.98634	90.0281	6.76558	366.183	167.998	79.9475	1.98634
standard	461.486	24128	5.52596	0.746764	2.55188	0.0925197	1.35	0.529022	570.422	7.36983	566.345	11.0779	549.986	47.2879	570.422	7.36983
JV61204-1-15	475.864	3020	1.71691	0.0951823	9.31642	0.0131342	1.03	0.110558	84.1171	0.860778	92.3195	8.22164	309.812	211.197	84.1171	0.860778
JV61204-1-16	429.548	2384	1.65451	0.0794602	15.0946	0.0124127	1.66	0.109973	79.525	1.31201	77.6373	11.2827	19.8871	362.002	79.525	1.31201
JV61204-1-17	406.768	2228	1.08271	0.0852425	19.8731	0.0125224	5.46	0.274743	80.2235	4.35306	83.0619	15.8511	165.435	450.105	80.2235	4.35306
JV61204-1-18	204.082	1394	1.18249	0.0789378	21.4381	0.0126274	2.53	0.118014	80.8915	2.03377	77.1458	15.9272	-37.3836	521.797	80.8915	2.03377
JV61204-1-19	296.645	2592	1.76781	0.0976449	11.8862	0.0123032	4.64	0.390367	78.8277	3.63533	94.6001	10.7369	513.078	241.089	78.8277	3.63533
standard	482.389	27314	4.68931	0.74721	4.12152	0.0904204	1.2	0.291155	558.023	6.41464	566.604	17.899	601.179	85.3807	558.023	6.41464
JV61204-1-20	596.495	4298	2.33626	0.0809651	8.98169	0.0125342	1.45	0.161439	80.2986	1.15711	79.0519	6.83095	41.5069	212.315	80.2986	1.15711
JV61204-1-21	415.765	3702	1.75236	0.0790412	16.4678	0.0123951	2.78	0.168814	79.4128	2.19413	77.2431	12.249	10.5968	392.651	79.4128	2.19413
JV61204-1-22	632.211	3608	1.92201	0.0904932	6.86145	0.0131885	0.93	0.13554	84.4625	0.780378	87.9627	5.78154	183.993	158.489	84.4625	0.780378
JV61204-1-23	303.101	2648	2.06871	0.0899061	14.8287	0.01297	2.47	0.166569	83.0721	2.03872	87.4159	12.4209	207.69	340.635	83.0721	2.03872
JV61204-1-24	429.525	2810	1.79854	0.0932604	11.006	0.01274	1.16	0.105398	81.6088	0.940696	90.5361	9.53332	332.689	248.81	81.6088	0.940696
standard	517.875	30034	4.32355	0.739632	3.43368	0.0921148	1.63	0.47471	568.032	8.86272	562.191	14.8244	538.597	66.1272	568.032	8.86272
standard	545.394	33986	3.48511	0.741155	2.86574	0.090767	0.98	0.341972	560.071	5.25703	563.08	12.3868	575.232	58.5574	560.071	5.25703
Sample JV62004-1
standard	535.035	27872.9	4.41678	0.742472	2.29158	0.0911208	1	0.436379	562.162	5.38348	563.847	9.91502	570.628	44.8667	562.162	5.38348
standard	568.248	48257.1	4.57564	0.730745	2.40899	0.0901163	1.19443	0.49582	556.225	6.36515	556.99	10.3279	560.1	45.6039	556.225	6.36515
standard	505.676	36662.2	3.60201	0.75221	2.85443	0.0910647	1	0.350333	561.831	5.38044	569.506	12.443	600.248	57.8908	561.831	5.38044
standard	518.031	42672.4	4.50825	0.737893	2.80959	0.0909469	1.12809	0.401516	561.135	6.06245	561.176	12.1133	561.321	56.0845	561.135	6.06245
standard	493.055	40811.5	4.43516	0.74835	3.25798	0.0933535	1.16381	0.357217	575.34	6.40574	567.267	14.1607	535.011	66.6238	575.34	6.40574
JV62004-1-01	372.96	1610.92	2.19215	0.166827	15.439	0.0183845	4.13226	0.267651	117.438	4.8089	156.662	22.4171	800.43	313.282	117.438	4.8089
JV62004-1-02	309.857	2528.21	1.32742	0.15963	11.5924	0.0181625	4.22732	0.364663	116.033	4.86119	150.379	16.2044	733.11	229.237	116.033	4.86119
JV62004-1-04	307.997	1536.36	2.78534	0.255397	25.9257	0.0215363	6.93177	0.267371	137.358	9.42064	230.951	53.6042	1338.37	490.571	137.358	9.42064
standard	491.886	49018.3	4.568	0.743265	2.75559	0.0923569	1.54439	0.560458	569.461	8.41746	564.309	11.9301	543.572	49.8888	569.461	8.41746
JV62004-1-05	292.746	616.899	1.66166	0.298174	24.524	0.0213548	7.39315	0.301466	136.212	9.96474	264.973	57.2556	1647.48	439.862	136.212	9.96474
JV62004-1-06	1034.36	3536.89	1.11621	0.155733	21.0178	0.0169275	3.93251	0.187104	108.209	4.21979	146.961	28.7644	829.166	434.963	108.209	4.21979
standard	478.681	39996.5	3.67823	0.737042	3.32552	0.0907097	1	0.300705	559.733	5.36121	560.678	14.3285	564.494	69.0942	559.733	5.36121
JV62004-1-09	328.801	1466.54	1.81217	0.122393	20.2638	0.0125017	3.24379	0.160078	80.0913	2.58192	117.239	22.4405	957.538	412.812	80.0913	2.58192
JV62004-1-10	249.703	1475.68	2.0393	0.239005	25.6559	0.0211242	4.6389	0.180813	134.757	6.18637	217.606	50.2928	1246.91	502.038	134.757	6.18637
JV62004-1-12	402.027	4176.93	1.0027	0.138779	13.9335	0.0181708	5.2624	0.377681	116.085	6.05418	131.955	17.243	428.066	288.725	116.085	6.05418
standard	508.545	35983.7	4.53763	0.73477	2.5632	0.0900109	1.6342	0.637564	555.602	8.69938	559.349	11.024	574.604	42.9399	555.602	8.69938
JV62004-1-13	132.982	1858.79	2.07851	0.200706	33.1641	0.0198013	5.51944	0.166428	126.4	6.90862	185.724	56.3467	1028.12	679.198	126.4	6.90862
JV62004-1-14	152.484	2315.76	1.98837	0.130714	35.0348	0.0186261	3.81304	0.108836	118.967	4.49466	124.739	41.1468	236.175	826.012	118.967	4.49466
JV62004-1-15	308.847	3744.06	1.14073	0.151084	16.5569	0.0182711	5.26742	0.31814	116.72	6.09281	142.868	22.0693	602.555	341.616	116.72	6.09281
JV62004-1-16	276.352	2141.36	0.507438	0.130008	27.9943	0.0156199	5.54793	0.198181	99.9141	5.50043	124.105	32.7144	616.692	602.961	99.9141	5.50043
standard	487.715	40674.7	4.41309	0.758594	2.99465	0.0932457	1.59872	0.533858	574.704	8.79025	573.199	13.1173	567.211	55.1363	574.704	8.79025
JV62004-1-18	226.906	2089.26	1.71362	0.163838	17.4402	0.0190939	5.10339	0.292623	121.927	6.16394	154.057	24.9339	682.097	358.469	121.927	6.16394
JV62004-1-19	277.202	449.5	1.59945	0.394227	35.578	0.0227514	10.0298	0.28191	145.021	14.383	337.453	102.494	2038.27	623.607	2038.27	623.607
JV62004-1-20	289.903	3701.49	1.53329	0.140364	25.2875	0.0190576	2.47227	0.0977665	121.697	2.98045	133.368	31.6147	346.577	577.362	121.697	2.98045
standard	468.797	40216.5	4.59411	0.753407	2.74607	0.0927258	1.31385	0.478449	571.638	7.18711	570.199	11.9814	564.45	52.5289	571.638	7.18711
JV62004-1-23	1136.63	1226.23	0.44934	0.170617	23.0291	0.0168903	4.22327	0.183388	107.972	4.52199	159.954	34.094	1021.22	464.014	107.972	4.52199
standard	460.56	53896.7	3.5238	0.747776	3.36437	0.0901081	1	0.297232	556.176	5.32859	566.933	14.6167	610.304	69.4466	556.176	5.32859
standard	504.613	35166.2	4.49007	0.731346	3.00117	0.0903656	1.19466	0.398066	557.699	6.38256	557.343	12.8731	555.868	60.0628	557.699	6.38256
Sample JV70905-1
standard	521.176	80455	3.53743	0.728665	2.52425	0.0909671	1.65	0.653659	561.254	8.86901	555.769	10.8043	533.345	41.8314	561.254	8.86901
standard	505.968	95245	5.34654	0.748556	2.21076	0.0907755	1.31	0.592557	560.122	7.02786	567.386	9.61012	596.59	38.5805	560.122	7.02786
standard	527.614	92295	5.30867	0.740305	2.61889	0.0915553	1	0.381841	564.729	5.407	562.583	11.3123	553.895	52.8197	564.729	5.407
standard	512.337	100750	5.11971	0.759036	2.62141	0.0929256	2.06	0.785837	572.817	11.291	573.454	11.4861	575.961	35.2443	572.817	11.291
standard	520.276	81060	4.96872	0.744242	3.83742	0.0903248	1.7	0.443006	557.458	9.07859	564.878	16.6271	594.853	74.5698	557.458	9.07859
JV70905-1-01	314.681	11570	2.17287	0.16453	9.55288	0.0224353	1.07	0.112008	143.029	1.51356	154.661	13.7052	336.789	215.506	143.029	1.51356
JV70905-1-02	437.544	11420	1.42991	0.147862	4.73106	0.0214905	2.21	0.467126	137.069	2.99725	140.022	6.18813	190.355	97.3509	137.069	2.99725
JV70905-1-03	469.529	16215	1.84288	0.160653	7.26431	0.0224941	1.27	0.174827	143.4	1.80107	151.274	10.21	276.503	163.991	143.4	1.80107
JV70905-1-04	314.104	7905	2.55452	0.140973	16.6069	0.0219324	2.25	0.135486	139.857	3.1129	133.91	20.8373	29.6533	396.653	139.857	3.1129
JV70905-1-05	134.563	7840	1.2038	0.172059	16.2273	0.0230488	1.43	0.0881233	146.896	2.07685	161.205	24.1928	376.911	365.761	146.896	2.07685
standard	521.707	130450	5.13145	0.736162	2.79793	0.0920698	2.15	0.768427	567.766	11.6849	560.164	12.0467	529.376	39.2332	567.766	11.6849
JV70905-1-06	175.271	11570	2.9973	0.171189	11.9164	0.0219219	3.02	0.253432	139.791	4.17625	160.45	17.6876	477.383	255.592	139.791	4.17625
JV70905-1-07	592.323	18055	3.98231	0.154969	5.88926	0.0218073	1.51	0.256399	139.068	2.07744	146.29	8.02368	265.014	130.733	139.068	2.07744
JV70905-1-08	299.658	8255	2.61926	0.149551	13.389	0.0213328	1.99	0.148629	136.074	2.67949	141.515	17.6882	233.745	306.738	136.074	2.67949
JV70905-1-09	451.783	12935	2.33217	0.146844	8.9367	0.0210595	1.76	0.196941	134.349	2.34007	139.121	11.6192	221.325	203.015	134.349	2.34007
JV70905-1-10	571.207	20315	2.68659	0.150899	4.73284	0.0215637	1.1	0.232418	137.531	1.49682	142.706	6.30097	229.61	106.372	137.531	1.49682
standard	523.876	91755	3.85414	0.738731	3.26242	0.0907694	1.77	0.542542	560.086	9.49507	561.665	14.0751	568.046	59.6643	560.086	9.49507
JV70905-1-11	242.98	5630	2.43918	0.177285	7.82924	0.0214891	1.42	0.181371	137.06	1.92571	165.722	11.9718	597.582	166.989	137.06	1.92571
JV70905-1-12	362.658	8970	2.7198	0.149503	7.30996	0.0208643	1.82	0.248975	133.116	2.39786	141.473	9.6538	284.033	162.103	133.116	2.39786
JV70905-1-13	414.513	12460	2.47159	0.151573	5.82435	0.0210037	1.13	0.194013	133.996	1.49853	143.299	7.78422	300.222	130.397	133.996	1.49853
JV70905-1-14	124.663	6215	3.1316	0.190061	16.4715	0.0226259	2.58	0.156634	144.23	3.67982	176.681	26.7171	636.525	352.211	144.23	3.67982
JV70905-1-15	576.653	17805	1.87544	0.147173	5.1898	0.0201819	2.59	0.499056	128.805	3.30295	139.413	6.76062	324.02	102.175	128.805	3.30295
standard	528.93	83355	3.41302	0.741524	2.32099	0.0916647	1.82	0.784147	565.375	9.85151	563.295	10.0349	554.881	31.4244	565.375	9.85151
JV70905-1-16	145.594	6245	2.08567	0.168088	26.9979	0.0216177	1.57	0.0581526	137.872	2.14161	157.758	39.4675	467.849	606.823	137.872	2.14161
JV70905-1-17	361.666	14975	3.61133	0.154908	10.7795	0.0212512	3.86	0.358086	135.559	5.17793	146.236	14.682	323.097	229.103	135.559	5.17793
JV70905-1-18	236.08	7500	2.76332	0.158299	20.2012	0.0217672	1	0.049502	138.815	1.37331	149.214	28.0399	317.789	462.842	138.815	1.37331
JV70905-1-19	453.26	16995	3.39831	0.151288	5.06603	0.0214767	1.89	0.373073	136.982	2.56164	143.049	6.75968	244.881	108.317	136.982	2.56164
JV70905-1-20	270.788	6070	2.18468	0.166935	10.426	0.021447	1	0.0959139	136.795	1.35354	156.756	15.1454	470.165	230.261	136.795	1.35354
standard	496.114	91935	4.87425	0.755774	1.85469	0.0924414	1	0.539174	569.96	5.4549	571.569	8.1065	577.954	33.9465	569.96	5.4549
standard	517.206	73345	5.01961	0.735213	2.74158	0.0918808	1.21	0.441351	566.651	6.56377	559.608	11.7954	531.05	53.8957	566.651	6.56377
standard	509.545	82940	3.84221	0.739134	2.50529	0.0907082	1.41	0.56281	559.724	7.55919	561.9	10.8117	570.7	45.0611	559.724	7.55919
standard	515.314	95495	3.39088	0.747337	1.96854	0.0915069	1.45	0.736586	564.443	7.83635	566.678	8.54918	575.638	28.9454	564.443	7.83635
standard	533.937	85440	5.04244	0.741841	2.64753	0.09157	1.65	0.623222	564.815	8.92286	563.479	11.4496	558.069	45.1498	564.815	8.92286
Sample JV63004-1
standard	517.788	36416	4.72009	0.745221	2.42035	0.0920957	1.16	0.479269	567.919	6.30601	565.448	10.4944	555.498	46.3429	567.919	6.30601
standard	514.4	27668	3.99773	0.739531	3.09252	0.0905839	1.54	0.497976	558.99	8.24577	562.132	13.3503	574.848	58.3184	558.99	8.24577
JV63004-1-01	642.324	12390	1.66596	0.298604	3.52615	0.0402404	2.62	0.743021	254.323	6.53354	265.309	8.23301	363.439	53.2242	109.432	2.65845
JV63004-1-02	537.883	5574	4.89505	0.130365	6.81479	0.018786	0.81	0.118859	119.979	0.962841	124.426	7.98057	210.234	156.995	114.147	2.4665
JV63004-1-03	116.923	22670	2.38614	8.38324	3.03331	0.39648	1.4	0.461544	2152.81	25.6234	2273.37	27.524	2383.63	45.8414	114.191	3.28238
JV63004-1-04	207.746	3210	2.05107	0.141911	11.9247	0.0189245	2.95	0.247386	120.855	3.53202	134.744	15.0484	387.059	260.236	114.217	1.61891
JV63004-1-04R	345.214	4284	4.2623	0.13344	13.5101	0.0187566	1.73	0.128053	119.793	2.05328	127.184	16.1514	267.606	308.545	114.598	3.49843
standard	523.15	35940	4.0445	0.725726	4.19916	0.0901274	3.24	0.771584	556.291	17.2681	554.041	17.9324	544.787	58.3838	556.291	17.2681
JV63004-1-05	311.222	4492	2.61258	0.129144	9.24624	0.0190472	2.48	0.268217	121.631	2.98818	123.328	10.7383	156.15	208.878	116.131	1.31204
JV63004-1-06	448.883	5508	4.44935	0.131066	8.5595	0.0184166	2.33	0.272212	117.641	2.71617	125.055	10.0715	268.388	189.188	116.141	1.23158
JV63004-1-07	504.813	6100	3.54512	0.124524	6.20039	0.0178757	1.43	0.230631	114.217	1.61891	119.165	6.97172	219.099	139.73	116.837	1.95676
JV63004-1-08	636.877	9578	4.24641	0.298324	4.89823	0.0327961	1.43	0.291942	208.024	2.92726	265.091	11.4286	805.496	98.1238	117.641	2.71617
JV63004-1-09	461.171	4906	3.55438	0.128633	7.47782	0.0182896	1.69	0.226002	116.837	1.95676	122.869	8.65396	241.213	168.089	117.863	1.1796
standard	499.216	25288	4.44504	0.746371	2.75811	0.091601	1.75	0.634492	564.999	9.46658	566.117	11.9696	570.589	46.3895	564.999	9.46658
JV63004-1-10	494.241	6496	3.77974	0.141005	5.22749	0.0193431	1.75	0.334769	123.503	2.14073	133.938	6.55957	323.18	111.936	117.925	1.41392
JV63004-1-11	366.917	4328	4.01304	0.124681	6.10405	0.0184615	1.21	0.198229	117.925	1.41392	119.307	6.87111	146.935	140.407	119.007	1.46215
JV63004-1-12	469.128	6044	4.4783	0.113681	8.32778	0.017936	3.08	0.369846	114.598	3.49843	109.327	8.63171	-4.05236	186.856	119.793	2.05328
JV63004-1-13	209.697	4246	2.78777	0.238869	9.88078	0.0331396	1.14	0.115376	210.168	2.35728	217.494	19.3468	297.532	224.41	119.979	0.962841
JV63004-1-14	374.101	4616	1.66346	0.202553	7.35806	0.0269403	3.05	0.414512	171.37	5.15792	187.284	12.5849	392.984	150.367	120.855	3.53202
standard	534.109	33890	5.24463	0.751685	2.71944	0.0923966	0.99	0.364046	569.695	5.39795	569.202	11.8497	567.209	55.1502	569.695	5.39795
JV63004-1-15	316.283	3062	4.02723	0.139584	8.32058	0.0184517	1.01	0.121386	117.863	1.1796	132.674	10.3488	406.725	185.113	121.631	2.98818
JV63004-1-16	468.205	4626	4.15076	0.117527	8.54503	0.0181796	1.07	0.125219	116.141	1.23158	112.828	9.12505	43.4483	202.98	123.503	2.14073
JV63004-1-17	391.451	5470	3.77329	0.125229	22.9564	0.018178	1.14	0.0496593	116.131	1.31204	119.802	25.9474	193.304	539.277	131.026	2.16605
JV63004-1-18	506.486	5456	3.94659	0.11657	7.34037	0.0178647	2.18	0.296988	114.147	2.4665	111.958	7.78141	65.6331	167.045	171.37	5.15792
JV63004-1-19	444.057	6172	5.48063	0.133559	8.12553	0.0205334	1.67	0.205525	131.026	2.16605	127.29	9.72126	58.06	189.842	208.024	2.92726
standard	523.986	39036	4.43753	0.747195	2.87447	0.0915859	2.1	0.73057	564.91	11.3582	566.596	12.4825	573.349	42.6903	564.91	11.3582
JV63004-1-20	405.133	2648	3.22394	0.132308	8.87871	0.0186325	1.24	0.13966	119.007	1.46215	126.17	10.5346	263.295	202.171	210.168	2.35728
JV63004-1-21	488.944	4974	3.19082	0.131958	11.4103	0.0178717	2.9	0.254156	114.191	3.28238	125.856	13.507	352.201	250.025	215.124	5.7125
JV63004-1-22	294.258	64950	1.80495	8.76809	1.4679	0.363937	0.500001	0.340622	2000.81	8.60045	2314.18	13.3797	2603.5	22.9974	254.323	6.53354
JV63004-1-23	418.172	3796	1.50984	0.116489	9.19375	0.0171205	2.45	0.266485	109.432	2.65845	111.884	9.74018	164.359	207.456	2383.63	45.8414
JV63004-1-24	367.26	6990	2.57248	0.240287	4.8052	0.0339342	2.7	0.561892	215.124	5.7125	218.655	9.45282	256.822	91.3917	2603.5	22.9974
standard	515.107	26926	4.30746	0.746844	2.86668	0.0929445	1.88	0.655812	572.928	10.3063	566.392	12.4453	540.21	47.3353	572.928	10.3063
standard	516.244	27094	4.14765	0.724112	2.19102	0.089064	1.09	0.497485	549.999	5.74637	553.092	9.34391	565.822	41.3909	549.999	5.74637
Sample DE-000-DZ
DE-000-1	78.6846	1380.21	1.02361	0.117028	16.842	0.0201103	9.56025	0.567644	128.353	12.1495	112.374	17.9182	-214.268	349.749	128.353	12.1495
DE-000-2	86.0369	27298.9	0.492602	11.2252	3.71186	0.485549	2.19935	0.59252	2551.39	46.3412	2542.01	34.6201	2534.51	50.1707	2534.51	50.1707
DE-000-3	599.551	6395.71	2.51864	0.129907	3.71476	0.0192104	2.65789	0.715495	122.664	3.22945	124.014	4.33664	149.963	60.8322	122.664	3.22945
DE-000-4	522.491	19894.4	1.05076	1.74615	5.85855	0.170218	5.37236	0.917012	1013.31	50.3769	1025.74	37.8424	1052.33	47.087	1052.33	47.087
DE-000-5	131.246	1530.07	0.732565	0.0985677	11.2521	0.0145024	4.23746	0.376593	92.8171	3.9049	95.4533	10.2514	161.81	244.334	92.8171	3.9049
standard	609.082	43186	3.65139	0.729896	1.99134	0.0906848	1.48104	0.743742	559.586	7.93818	556.492	8.53152	543.835	29.0957	559.586	7.93818
DE-000-6	314.499	27822.9	1.36147	1.18327	2.8406	0.130681	1.50251	0.528942	791.747	11.1946	792.833	15.6333	795.87	50.5502	791.747	11.1946
DE-000-7	134.041	14230.7	0.556028	1.56265	3.80736	0.157342	2.83166	0.743733	941.99	24.8168	955.518	23.5779	986.78	51.8005	941.99	24.8168
DE-000-8	244.136	4532.62	1.59137	0.128503	7.4013	0.0200574	3.69317	0.498989	128.019	4.6813	122.752	8.55774	21.8604	154.076	128.019	4.6813
DE-000-9	121.313	40300.4	1.53054	10.3803	2.04727	0.45545	1.32571	0.647552	2419.44	26.7432	2469.29	18.9632	2510.58	26.234	2510.58	26.234
DE-000-10	108.144	1505.47	1.36552	0.144653	8.88057	0.0202393	5.23755	0.589777	129.168	6.69793	137.18	11.3957	278.156	164.384	129.168	6.69793
standard	571.892	37912.4	3.29074	0.759911	1.86455	0.0931377	1.573	0.843636	574.067	8.6397	573.959	8.17497	573.509	21.7727	574.067	8.6397
DE-000-11	85.848	1602.8	1.00048	0.118638	21.546	0.0201567	6.31737	0.293203	128.646	8.04652	113.837	23.2064	-185.766	519.267	128.646	8.04652
DE-000-12	214.941	33827.6	1.49403	2.25006	2.7482	0.205782	2.04873	0.74548	1206.3	22.5394	1196.8	19.3211	1179.67	36.2205	1179.67	36.2205
DE-000-13	217.081	3913.98	1.17198	0.154103	9.59745	0.0215016	7.63846	0.795885	137.139	10.3647	145.528	13.0129	284.519	132.989	137.139	10.3647
DE-000-14	105.337	1553.17	1.14708	0.124927	16.207	0.0187831	4.64467	0.286584	119.961	5.52025	119.529	18.2773	110.923	368.451	119.961	5.52025
DE-000-15	92.5834	1553.17	0.880222	0.122362	12.0764	0.0197148	5.0872	0.421252	125.853	6.34032	117.212	13.3693	-54.8363	267.433	125.853	6.34032
standard	530.384	38210.9	2.67384	0.740711	1.88693	0.090843	1.27908	0.677861	560.521	6.86663	562.82	8.15299	572.105	30.1776	560.521	6.86663
DE-000-16	84.4254	22194	0.293948	11.0221	3.16622	0.478085	2.05298	0.648399	2518.92	42.8069	2525	29.4834	2529.88	40.463	2529.88	40.463
DE-000-17	243.016	3979.07	0.724087	0.151074	10.0983	0.021985	7.16679	0.709702	140.189	9.9386	142.86	13.4583	187.428	165.773	140.189	9.9386
DE-000-18	697.976	8328.49	0.613842	0.574466	4.56565	0.0704691	2.51032	0.549828	438.981	10.653	460.899	16.9162	571.645	82.9898	438.981	10.653
DE-000-19	430.726	27744.8	7.71331	0.771799	1.96261	0.0940957	1.10069	0.56083	579.714	6.10238	580.795	8.68091	585.001	35.2719	579.714	6.10238
DE-000-20	262.039	42723.1	1.85276	3.90014	7.45293	0.268449	6.04425	0.81099	1532.92	82.4656	1613.71	60.303	1720.77	80.154	1720.77	80.154
standard	576.374	41532.8	2.68141	0.713396	2.24565	0.0877182	1	0.445305	542.028	5.19866	546.761	9.4942	566.511	43.7833	542.028	5.19866
DE-000-S21	207.425	1840.8	1.17257	0.159063	10.3153	0.0209149	4.31608	0.418417	133.435	5.69999	149.882	14.3748	418.629	209.644	133.435	5.69999
DE-000-S22	344.097	59877.1	3.82499	4.06578	6.57303	0.259366	5.83814	0.888196	1486.6	77.513	1647.47	53.6162	1859.23	54.5611	1859.23	54.5611
DE-000-S23	208.873	2745.87	1.97358	0.131344	4.799	0.0196231	2.18001	0.454264	125.273	2.70461	125.305	5.6572	125.886	100.685	125.273	2.70461
DE-000-S24	180.219	2336.48	0.841565	0.132638	8.63465	0.0198615	5.5232	0.639656	126.781	6.93395	126.466	10.2676	120.527	156.527	126.781	6.93395
standard	575.883	42075.4	3.25146	0.745064	1.63502	0.0921901	1	0.611614	568.477	5.44132	565.356	7.08829	552.802	28.231	568.477	5.44132
DE-000-26	172.376	3574.23	0.882548	0.15772	13.7092	0.0214994	7.77237	0.566945	137.125	10.5453	148.705	18.966	337.555	256.552	137.125	10.5453
DE-000-27	131.12	2363.21	0.884266	0.118246	10.5158	0.0188047	3.82985	0.364201	120.097	4.55697	113.48	11.2911	-23.1706	237.566	120.097	4.55697
DE-000-28	81.0388	1214.44	1.05573	0.112093	11.4525	0.0182923	5.21382	0.455258	116.854	6.0377	107.878	11.7215	-86.0446	250.415	116.854	6.0377
DE-000-30	110.184	1712.66	0.904016	0.138766	9.16426	0.0189031	5.06679	0.552886	120.72	6.0597	131.944	11.3395	339.07	173.166	120.72	6.0597
standard	687.678	50210.2	3.84069	0.742268	1.97588	0.0916463	1.3302	0.67322	565.266	7.19895	563.728	8.54766	557.506	31.8619	565.266	7.19895
DE-000-31	126.437	1608.63	1.29642	0.125509	12.7166	0.0195286	6.17828	0.485845	124.676	7.62882	120.055	14.3998	29.408	267.125	124.676	7.62882
DE-000-32	483.148	35334.1	2.13763	2.10271	3.94252	0.196658	3.20899	0.813943	1157.34	33.9964	1149.7	27.136	1135.28	45.588	1135.28	45.588
DE-000-33	155.871	1566.26	0.526017	0.115185	12.1113	0.0161647	5.53269	0.456819	103.371	5.6736	110.697	12.7026	271.278	247.606	103.371	5.6736
DE-000-34	259.621	67759.5	1.23034	10.4906	1.75985	0.469523	1.33194	0.756851	2481.47	27.4338	2479.08	16.3155	2477.12	19.4053	2477.12	19.4053
DE-000-35	374.136	26854.5	5.24075	1.00331	1.7024	0.114568	1.13698	0.667868	699.22	7.53399	705.488	8.65741	725.475	26.8706	699.22	7.53399
standard	553.121	36780.1	3.92537	0.741933	3.03142	0.091182	1.2058	0.397769	562.524	6.49541	563.533	13.1109	567.588	60.5567	562.524	6.49541
DE-000-36	259.76	2917.17	0.721351	0.120502	10.0492	0.0181605	7.83902	0.780062	116.02	9.01346	115.527	10.9739	105.359	148.692	116.02	9.01346
DE-000-39	193.212	3129.06	1.35943	0.132721	6.30548	0.0199448	4.18488	0.66369	127.307	5.27539	126.54	7.50194	112.129	111.371	127.307	5.27539
DE-000-38	64.5339	1465.47	1.07996	0.153925	15.2085	0.0202174	6.97501	0.458625	129.03	8.91038	145.371	20.6019	421.041	302.929	129.03	8.91038
DE-000-40	165.653	11135.4	0.575499	0.721839	3.45879	0.0886375	2.22796	0.644145	547.474	11.6939	551.752	14.7242	569.431	57.5843	547.474	11.6939
standard	500.056	45740.2	3.68645	0.732427	3.10904	0.0907814	1.44835	0.46585	560.157	7.77053	557.977	13.3472	549.074	60.0868	560.157	7.77053
DE-000-41	178.708	2672.49	0.748271	0.126161	9.20414	0.0201454	5.9332	0.644623	128.574	7.55301	120.643	10.4702	-33.0288	170.838	128.574	7.55301
DE-000-42	141.418	2691.73	1.17794	0.133693	12.1656	0.0196665	7.61315	0.625791	125.548	9.46568	127.41	14.5682	162.274	222.316	125.548	9.46568
DE-000-43	96.2344	47289.6	0.911728	5.41645	5.1767	0.342706	4.61224	0.890962	1899.67	75.8911	1887.46	44.3996	1874.03	42.388	1874.03	42.388
DE-000-44	85.6969	2293.06	1.48603	0.140947	15.1066	0.0208822	4.78416	0.316693	133.229	6.30847	133.887	18.9513	145.56	337.576	133.229	6.30847
DE-000-45	92.382	2757.72	1.49538	0.130517	8.97105	0.0203081	4.02513	0.44868	129.603	5.1646	124.562	10.5166	29.3528	192.435	129.603	5.1646
standard	333.811	31847.1	2.91955	0.781188	2.75309	0.094294	1.90823	0.693125	580.883	10.5999	586.161	12.2607	606.637	42.9213	580.883	10.5999
DE-000-46	201.055	3236.13	0.955057	0.131543	6.36603	0.0191692	4.30858	0.676808	122.403	5.22409	125.484	7.51458	184.22	109.196	122.403	5.22409
DE-000-47	149.992	18138.3	1.78373	2.63035	5.92109	0.213013	5.30744	0.896361	1244.85	60.0837	1309.16	43.5877	1416.11	50.2044	1416.11	50.2044
DE-000-48	201.093	3416.32	1.9178	0.124098	7.03537	0.0195828	3.97701	0.565288	125.018	4.92409	118.781	7.88656	-4.41847	140.082	125.018	4.92409
DE-000-49	183.996	42109.7	0.602537	4.89834	2.70337	0.314943	1.18438	0.438111	1764.99	18.2867	1801.97	22.7996	1845.02	43.9762	1845.02	43.9762
DE-000-50	236.532	4018.1	1.17467	0.138321	5.55731	0.0203876	3.93772	0.708565	130.105	5.07181	131.547	6.85685	157.657	91.8072	130.105	5.07181
standard	468.658	35945	3.77976	0.744438	1.59858	0.0906798	1	0.625557	559.556	5.35959	564.992	6.92696	586.917	27.0624	559.556	5.35959
DE-000-51	205.663	26857.3	2.05203	2.17137	2.054	0.199824	1.16413	0.566763	1174.37	12.4983	1171.92	14.2806	1167.37	33.5215	1167.37	33.5215
DE-000-52	367.765	7344.28	1.06361	0.144581	4.70039	0.0210617	3.14396	0.668872	134.362	4.18058	137.116	6.02885	185.046	81.3878	134.362	4.18058
DE-000-53	243.683	4521.15	1.26211	0.140644	8.22662	0.0198079	4.48712	0.545439	126.442	5.61832	133.617	10.3	263.108	158.463	126.442	5.61832
DE-000-54	130.025	2068.96	1.14483	0.116148	10.4541	0.0187921	3.86104	0.369332	120.018	4.59106	111.573	11.0465	-65.107	237.548	120.018	4.59106
DE-000-55	108.572	1879.61	1.34471	0.117864	13.7376	0.019128	4.21358	0.306718	122.143	5.09812	113.134	14.7084	-72.5308	320.725	122.143	5.09812
standard	418.438	55767.2	3.00855	0.782428	4.36423	0.0969534	3.49642	0.801153	596.53	19.9213	586.867	19.4546	549.643	57.0383	596.53	19.9213
DE-000-56	453.488	13093.2	1.51901	0.529254	4.10046	0.069248	3.02708	0.738231	431.624	12.6378	431.314	14.4104	429.644	61.6654	431.624	12.6378
DE-000-57	179.237	1910.24	1.37171	0.133947	10.9433	0.0193596	8.19398	0.748765	123.607	10.0319	127.638	13.1263	203.337	168.535	123.607	10.0319
DE-000-58	178.167	50277.7	1.60812	6.39572	2.25874	0.373305	1.60412	0.710183	2044.93	28.1096	2031.68	19.8363	2018.23	28.1876	2018.23	28.1876
DE-000-59	136.962	968.994	1.21592	0.226309	31.6717	0.0216733	4.98201	0.157301	138.223	6.81298	207.147	59.4154	1087.95	642.38	138.223	6.81298
DE-000-60	365.122	73308.7	2.79847	12.6642	3.84974	0.510494	3.58217	0.930497	2658.74	78.0472	2655	36.2443	2652.15	23.3885	2652.15	23.3885
standard	443.957	37078	3.71137	0.732886	3.78541	0.0901279	1	0.264172	556.294	5.32967	558.246	16.2572	566.19	79.5209	556.294	5.32967
DE-000-61	323.287	15950.4	0.926464	0.853214	2.63145	0.102257	2.28273	0.867479	627.624	13.6516	626.411	12.3021	622.016	28.2394	627.624	13.6516
DE-000-62	251.539	5496.88	1.64381	0.262368	2.15296	0.037631	1.70419	0.791558	238.132	3.98419	236.574	4.54354	221.103	30.4376	238.132	3.98419
DE-000-63	190.152	4416.02	1.19038	0.299161	4.00688	0.040217	3.16049	0.788766	254.178	7.87697	265.745	9.36895	368.954	55.4954	254.178	7.87697
DE-000-64	257.091	3061.72	0.898323	0.168403	7.81386	0.0240539	2.18786	0.279998	153.226	3.31284	158.032	11.4359	230.677	173.439	153.226	3.31284
DE-000-65	100.603	1144.02	1.46128	0.105273	17.0489	0.0187403	3.85075	0.225865	119.69	4.56644	101.632	16.4896	-303.767	427.216	119.69	4.56644
standard	570.583	39239.2	2.7603	0.724478	1.6972	0.089067	1	0.589205	550.017	5.27206	553.307	7.24	566.851	29.8572	550.017	5.27206
DE-000-66	217.535	2321.02	1.23763	0.111961	8.45471	0.0181524	3.48495	0.412191	115.969	4.00532	107.758	8.64403	-70.137	188.395	115.969	4.00532
DE-000-67	333.522	5537.47	1.4852	0.574583	3.82073	0.0716578	3.47301	0.908992	446.136	14.9704	460.974	14.1577	535.589	34.8576	446.136	14.9704
DE-000-68	490.249	57533.5	2.97664	5.26642	2.23241	0.335107	1.65326	0.74057	1863.09	26.7503	1863.44	19.0525	1863.81	27.0834	1863.81	27.0834
DE-000-69	491.923	2366.86	2.63415	0.134033	4.53878	0.0178439	2.92795	0.645095	114.015	3.30895	127.715	5.44702	390.834	77.8507	114.015	3.30895
DE-000-70	24.5748	1836.96	12.2839	0.931925	8.46092	0.106968	6.51807	0.770373	655.113	40.6032	668.647	41.4648	714.511	114.683	655.113	40.6032
standard	661.882	47516.5	3.73243	0.75345	1.856	0.0934479	1.0475	0.564385	575.896	5.77089	570.224	8.098	547.652	33.4684	575.896	5.77089
DE-000-71	212.423	2222.84	0.841767	0.144168	9.36674	0.0197645	4.5028	0.480722	126.167	5.62583	136.75	11.9845	324.628	186.773	126.167	5.62583
DE-000-72	89.99	5652.2	1.08505	0.757058	4.00791	0.0917097	3.42011	0.853339	565.641	18.5211	572.311	17.5361	598.874	45.2534	565.641	18.5211
DE-000-73	293.915	57402.6	1.63794	24.1477	6.63794	0.666917	5.58333	0.841125	3293.96	144.026	3274.37	64.8082	3262.4	56.5114	3262.4	56.5114
DE-000-74	444.713	19124	9.97123	0.550552	4.51382	0.0709638	3.2265	0.714805	441.959	13.782	445.358	16.2751	462.935	69.9729	441.959	13.782
DE-000-75	136.496	1756.17	0.893018	0.125118	12.903	0.0190827	3.46511	0.268551	121.856	4.18279	119.701	14.5704	77.0679	296.243	121.856	4.18279
standard	544.258	38605.7	3.23286	0.768344	1.47679	0.0943118	1.01637	0.688226	580.988	5.6467	578.813	6.51546	570.264	23.3146	580.988	5.6467
DE-000-76	120.885	2113.96	1.15936	0.112712	17.0454	0.0198443	3.0025	0.176147	126.672	3.76619	108.443	17.5335	-275.555	429.234	126.672	3.76619
DE-000-77	175.838	2463.56	0.86809	0.129558	13.1236	0.0194559	9.80401	0.74705	124.216	12.0616	123.701	15.2853	113.782	206.151	124.216	12.0616
DE-000-78	211.353	12206.3	1.02928	0.659378	4.28853	0.0826201	1.75617	0.409505	511.743	8.63963	514.233	17.3049	525.296	85.8146	511.743	8.63963
DE-000-79	63.8919	3215.34	1.35401	0.543619	19.0874	0.0660253	5.85482	0.306737	412.165	23.3763	440.808	68.3578	593.244	396.77	412.165	23.3763
DE-000-80	59.1079	22586	0.979529	10.7072	2.86288	0.469302	1.54453	0.539504	2480.5	31.8024	2498.05	26.5922	2512.34	40.5345	2512.34	40.5345
standard	578.741	37442.7	2.62678	0.704571	1.88704	0.0876758	1.04379	0.553136	541.777	5.42389	541.518	7.92006	540.406	34.3829	541.777	5.42389
DE-000-81	178.57	2315.26	1.18038	0.143193	5.01181	0.0207404	2.04766	0.408568	132.333	2.68212	135.884	6.37428	198.356	106.309	132.333	2.68212
DE-000-82	142.841	2288.15	1.59825	0.140595	6.15022	0.0202791	3.84543	0.625251	129.42	4.92713	133.574	7.69781	208.062	111.355	129.42	4.92713
DE-000-83	83.0406	11914.6	0.938968	2.51025	4.4556	0.221117	4.06889	0.913208	1287.78	47.4971	1275	32.364	1253.51	35.5211	1253.51	35.5211
DE-000-84	424.355	45043.2	1.24911	1.55456	5.94177	0.152708	5.78849	0.974203	916.124	49.4349	952.309	36.7305	1036.87	27.0802	916.124	49.4349
standard	602.736	40816.7	3.28452	0.738239	1.48953	0.0906458	1	0.671351	559.355	5.35775	561.377	6.42352	569.561	24.0257	559.355	5.35775
DE-000-86	386.927	5587.17	2.43115	0.132974	5.09319	0.0193293	3.04364	0.597591	123.416	3.7206	126.766	6.06974	190.033	95.0407	123.416	3.7206
DE-000-87	272.777	2100.5	1.25555	0.106641	6.94143	0.0148123	3.69229	0.53192	94.786	3.47417	102.888	6.79211	294.848	134.281	94.786	3.47417
DE-000-88	174.428	2553.26	1.5906	0.131053	9.40951	0.0200237	6.46937	0.687535	127.806	8.18681	125.044	11.0708	72.8174	162.588	127.806	8.18681
DE-000-89	248.58	42006	1.32003	3.89493	2.19841	0.28613	1.32982	0.6049	1622.16	19.0717	1612.63	17.7638	1600.2	32.6658	1600.2	32.6658
DE-000-90	302.791	3359.49	1.20527	0.125247	6.32941	0.0189537	2.30494	0.364164	121.04	2.76388	119.818	7.15352	95.5995	139.636	121.04	2.76388
standard	675.856	43010.7	3.78432	0.733461	1.77881	0.090497	1.22256	0.687291	558.476	6.54032	558.582	7.64243	558.998	28.1697	558.476	6.54032
DE-000-91	124.913	1455.5	1.89709	0.127186	10.1296	0.0189586	4.80479	0.47433	121.071	5.76291	121.566	11.6061	131.248	210.062	121.071	5.76291
DE-000-92	277.927	38397.1	0.881266	3.86645	2.07702	0.280872	1.82002	0.876265	1595.75	25.7275	1606.71	16.7575	1621.08	18.623	1621.08	18.623
DE-000-93	395.425	6734.42	1.15376	0.239539	4.79509	0.0336639	3.08431	0.643223	213.439	6.47533	218.043	9.40925	268.025	84.2412	213.439	6.47533
DE-000-94	273.218	11990.1	1.65344	0.594446	2.41897	0.0754399	2.10169	0.868837	468.846	9.50392	473.703	9.15746	497.276	26.3872	468.846	9.50392
DE-000-95	452.518	10647.7	1.83671	0.308232	4.70485	0.0425903	3.81321	0.810485	268.869	10.0417	272.809	11.2561	306.735	62.7866	268.869	10.0417
standard	610.643	36433.7	2.53811	0.747039	1.4171	0.0922621	1	0.705668	568.902	5.44521	566.505	6.15284	556.874	21.8987	568.902	5.44521
DE-000-96	98.5509	1012.79	1.4772	0.17971	15.9976	0.0211269	5.04479	0.315347	134.774	6.72849	167.811	24.7496	663.461	326.961	134.774	6.72849
DE-000-98	124.649	2317.63	1.587	0.136554	7.3407	0.0207582	3.89603	0.530743	132.446	5.10748	129.97	8.95559	84.9184	147.693	132.446	5.10748
DE-000-99	340.056	31699.6	5.70735	1.31047	3.60886	0.127677	3.02836	0.839146	774.6	22.1032	850.336	20.7868	1053.44	39.5443	774.6	22.1032
DE-000-100	100.527	1616.7	0.744797	0.110595	15.1656	0.0190435	5.12822	0.338149	121.608	6.17788	106.51	15.3356	-219.387	360.455	121.608	6.17788
standard	475.179	39230.9	3.54166	0.761157	2.89622	0.0932581	1.63334	0.563956	574.777	8.9817	574.678	12.7104	574.263	52.0144	574.777	8.9817
standard	466.027	41590.9	2.95033	0.789353	2.11361	0.0964052	1.85526	0.877771	593.307	10.5161	590.805	9.46764	581.184	21.9924	593.307	10.5161
standard	671.211	50693.9	3.83584	0.730056	1.78443	0.0905033	1.3704	0.767979	558.513	7.33168	556.586	7.64597	548.693	24.9594	558.513	7.33168
standard	537.762	37476.2	2.72028	0.73379	2.03888	0.0901455	1.77536	0.870754	556.397	9.46378	558.775	8.76209	568.452	21.8228	556.397	9.46378
Sample DE-540-DZ
standard	618.132	43411.8	3.2338	0.725171	1.58543	0.0900059	1	0.630743	555.572	5.32305	553.715	6.76694	546.065	26.8805	555.572	5.32305
standard	484.262	32434.5	2.94097	0.736953	3.50712	0.0909701	2.46928	0.704077	561.272	13.2732	560.626	15.11	557.984	54.3125	561.272	13.2732
standard	478.964	36025.1	2.73805	0.750118	2.79529	0.0915149	2.07682	0.742969	564.49	11.2248	568.293	12.1658	583.521	40.6243	564.49	11.2248
standard	614.153	43892.5	2.58729	0.706159	1.57072	0.0879598	1	0.636652	543.46	5.21182	542.463	6.60111	538.257	26.5015	543.46	5.21182
standard	392.429	41356.2	2.90351	0.80046	2.62269	0.0978238	1.54152	0.587762	601.643	8.85482	597.088	11.84	579.803	46.1022	601.643	8.85482
DE0540-DZ-1	370.465	5844.63	0.96105	0.127214	6.47629	0.0179791	2.68079	0.413938	114.871	3.05217	121.592	7.42154	255.109	135.644	114.871	3.05217
DE0540-DZ-2	304.575	67640.8	1.22307	3.07781	2.39137	0.248609	1.51518	0.633603	1431.3	19.448	1427.18	18.329	1421.03	35.3582	1421.03	35.3582
DE0540-DZ-3	339.657	5894.82	2.97199	0.157636	4.26409	0.0214251	1.92936	0.452467	136.657	2.60885	148.631	5.89581	344.184	86.0718	136.657	2.60885
DE0540-DZ-4	392.941	106456	1.28615	5.36215	2.80493	0.340565	1.66103	0.592181	1889.39	27.2025	1878.83	24.0087	1867.16	40.7909	1867.16	40.7909
DE0540-DZ-5	76.1338	1593.92	1.10703	0.141752	19.4704	0.0184523	6.31247	0.324208	117.867	7.3727	134.603	24.5498	441.041	412.881	117.867	7.3727
standard	447.269	40839.5	2.93762	0.757158	3.30664	0.0932631	2.33533	0.706254	574.806	12.8426	572.369	14.4685	562.681	51.01	574.806	12.8426
DE0540-DZ-6	286.314	4457.41	1.28878	0.127013	2.76749	0.0183746	1.84187	0.665536	117.375	2.14233	121.41	3.16693	201.173	47.9623	117.375	2.14233
DE0540-DZ-7	205.67	12343.6	0.627801	0.616661	5.26573	0.0747275	3.54053	0.672373	464.575	15.8697	487.752	20.3974	598.135	84.4459	464.575	15.8697
DE0540-DZ-8	241.718	15519.5	1.02994	1.07141	2.91564	0.118888	2.2509	0.772009	724.16	15.4179	739.434	15.3139	785.954	38.9202	724.16	15.4179
DE0540-DZ-9	131.584	1910.23	0.995801	0.140857	10.7081	0.0211784	3.94642	0.368545	135.099	5.27611	133.807	13.4251	110.906	235.476	135.099	5.27611
DE0540-DZ-10	228.933	24076	1.31852	1.52601	2.17931	0.157943	1.93595	0.88833	945.336	17.0226	940.895	13.3689	930.495	20.5431	945.336	17.0226
standard	557.835	37914.2	2.99721	0.713	2.18528	0.0876303	1.34678	0.616299	541.507	6.99503	546.526	9.23593	567.486	37.4657	541.507	6.99503
DE0540-DZ-11	264.055	48125.5	0.996626	3.58132	2.12456	0.270561	1.18941	0.559838	1543.65	16.3275	1545.4	16.8652	1547.78	33.0754	1547.78	33.0754
DE0540-DZ-12	103.278	7625.25	0.589272	0.704479	3.16107	0.085569	2.0869	0.660187	529.278	10.6042	541.463	13.2668	593.08	51.4721	529.278	10.6042
DE0540-DZ-13	510.717	27977.6	0.776643	0.531117	2.61551	0.0693472	2.3526	0.899481	432.222	9.83507	432.551	9.21257	434.286	25.456	432.222	9.83507
DE0540-DZ-14	569.733	44839.4	1.23643	1.53285	6.26273	0.156847	5.64078	0.90069	939.233	49.3023	943.642	38.5028	953.926	55.6581	939.233	49.3023
DE0540-DZ-15	382.521	83926.9	1.78096	6.95099	1.99824	0.382285	1	0.500441	2086.95	17.8283	2105.19	17.7397	2123.05	30.3076	2123.05	30.3076
standard	554.881	42607.5	2.485	0.738216	2.64015	0.090684	2.35619	0.892445	559.581	12.6288	561.364	11.3856	568.575	25.9274	559.581	12.6288
DE0540-DZ-16	441.616	29335.6	2.8175	1.66242	3.26266	0.16463	3.09826	0.949611	982.455	28.2331	994.298	20.6883	1020.5	20.7042	1020.5	20.7042
DE0540-DZ-17	537.605	95286.8	2.27728	4.19032	4.45516	0.298369	4.23603	0.950814	1683.22	62.7548	1672.13	36.5371	1658.22	25.5598	1658.22	25.5598
DE0540-DZ-18	136.726	17163.8	1.63613	1.54268	2.6251	0.157197	1.98968	0.757944	941.18	17.4236	947.575	16.1732	962.442	34.9777	941.18	17.4236
DE0540-DZ-19	323.662	4060.05	0.875719	0.111345	8.99949	0.0173909	6.66607	0.740716	111.145	7.34551	107.195	9.15548	20.2563	145.264	111.145	7.34551
DE0540-DZ-20	415.673	12982.6	1.71837	0.291857	6.0403	0.0411707	4.90521	0.81208	260.086	12.5038	260.02	13.8571	259.41	80.9987	260.086	12.5038
standard	452.982	52804.4	3.39468	0.751133	4.07511	0.0926824	3.82302	0.938139	571.382	20.904	568.882	17.7505	558.882	30.7641	571.382	20.904
DE0540-DZ-21	77.0794	24527.1	1.09934	9.12114	7.96325	0.44407	6.86219	0.861733	2368.84	136.053	2350.23	72.994	2334.12	69.2053	2334.12	69.2053
DE0540-DZ-22	173.384	43858	4.95467	6.22204	3.48427	0.366069	3.33761	0.957907	2010.88	57.6574	2007.55	30.4892	2004.12	17.7597	2004.12	17.7597
DE0540-DZ-23	60.1191	6583.21	0.563659	2.05974	2.99318	0.183589	1.70354	0.569139	1086.55	17.034	1135.53	20.462	1230.38	48.3121	1230.38	48.3121
DE0540-DZ-24	664.344	28738.1	0.809396	0.523197	2.07349	0.0678542	1.81358	0.87465	423.215	7.42882	427.285	7.23184	449.278	22.328	423.215	7.42882
DE0540-DZ-25	73.1988	26616.7	1.08015	19.6893	3.23588	0.577418	3.04314	0.940434	2938.21	71.8127	3076.22	31.2784	3167.62	17.4342	3167.62	17.4342
standard	372.672	42872.8	3.2947	0.757538	2.46945	0.0924813	1.94564	0.787882	570.195	10.6175	572.589	10.808	582.081	33.0268	570.195	10.6175
DE0540-DZ-26	136.765	36111.4	1.03863	7.09929	3.55026	0.378302	3.40645	0.959493	2068.35	60.2736	2123.95	31.6081	2178.21	17.413	2178.21	17.413
DE0540-DZ-27	281.075	59812.2	0.575145	4.0895	2.99535	0.291511	2.55691	0.853629	1649.07	37.2045	1652.21	24.4431	1656.18	28.9053	1656.18	28.9053
DE0540-DZ-28	79.2659	9431.1	1.17843	1.55073	3.78311	0.154754	2.03857	0.538862	927.557	17.6116	950.785	23.3575	1004.93	64.6873	927.557	17.6116
DE0540-DZ-29	123.961	12944.2	1.06321	1.50212	4.11574	0.152926	2.21797	0.538899	917.342	18.965	931.249	25.0936	964.292	70.8139	917.342	18.965
DE0540-DZ-30	409.823	15734.9	3.53921	0.534351	2.98769	0.0692855	2.70662	0.905924	431.849	11.3056	434.693	10.5653	449.768	28.1018	431.849	11.3056
standard	411.635	34313.9	3.7318	0.73217	5.04514	0.0902193	4.34053	0.86034	556.834	23.1552	557.826	21.6566	561.858	56.0455	556.834	23.1552
DE0540-DZ-31	270.635	46180.1	0.986957	5.85944	5.86757	0.290593	5.7456	0.979213	1644.49	83.4015	1955.25	50.9354	2302.41	20.4445	2302.41	20.4445
DE0540-DZ-32	287.063	30062.9	1.30395	1.19401	2.67086	0.131603	2.31536	0.866895	797.005	17.3584	797.819	14.7598	800.074	27.8973	797.005	17.3584
DE0540-DZ-33	344.818	8216.31	1.19799	0.291359	2.84614	0.0389472	1.52654	0.536354	246.304	3.689	259.629	6.52039	381.685	54.002	246.304	3.689
DE0540-DZ-34	285.152	1979.87	1.37206	0.190056	16.6743	0.0173611	2.58249	0.154879	110.957	2.84093	176.677	27.0454	1182.02	327.763	110.957	2.84093
DE0540-DZ-35	520.231	19683.2	0.872642	0.675319	8.7064	0.0797648	3.42734	0.393658	494.719	16.3215	523.941	35.6499	653.396	171.997	494.719	16.3215
standard	380.807	28856.6	3.33817	0.716293	5.32705	0.0901303	3.42314	0.642596	556.308	18.2447	548.476	22.5781	516.058	89.6675	556.308	18.2447
DE0540-DZ-36	127.566	2252.1	0.605746	0.123855	12.8413	0.0192185	7.15533	0.557211	122.715	8.69761	118.561	14.3705	35.961	255.896	122.715	8.69761
DE0540-DZ-38	389.435	3976.24	0.356973	0.127398	7.42363	0.017132	4.06443	0.547498	109.505	4.41316	121.757	8.51807	368.214	140.088	109.505	4.41316
DE0540-DZ-37	130.659	6985.43	0.960169	0.574276	4.21446	0.0699038	2.94236	0.698158	435.576	12.3928	460.776	15.6115	588.429	65.4683	435.576	12.3928
DE0540-DZ-39	454.735	124900	7.823	10.0125	6.57336	0.413502	5.45345	0.829629	2230.91	102.851	2435.93	60.7564	2611.89	61.1267	2611.89	61.1267
DE0540-DZ-40	517.237	108600	3.6257	5.07492	5.42967	0.318761	4.30409	0.792698	1783.67	67.0679	1831.92	46.0883	1887.19	59.605	1887.19	59.605
standard	507.034	48293.2	3.45274	0.785014	1.68522	0.0963009	1.34796	0.799875	592.694	7.63303	588.34	7.5254	571.554	22.0041	592.694	7.63303
DE0540-DZ-41	432.515	24162.6	1.24491	0.56669	6.21444	0.0703373	3.36986	0.542263	438.188	14.2756	455.872	22.828	546.015	114.151	438.188	14.2756
DE0540-DZ-42	59.0554	23108.9	1.71636	9.65203	5.53853	0.443589	3.90243	0.704597	2366.69	77.3056	2402.14	51.0006	2432.33	66.6386	2432.33	66.6386
DE0540-DZ-43	300.202	12106	0.80485	0.697023	5.08047	0.0795614	3.0348	0.597346	493.504	14.418	537.011	21.1912	726.315	86.4255	493.504	14.418
DE0540-DZ-44	312.06	14979.6	0.886232	0.387482	5.39695	0.0519713	3.48393	0.645536	326.613	11.0955	332.528	15.3051	374.102	92.8105	326.613	11.0955
DE0540-DZ-45	142.34	25424.9	1.19507	2.1956	4.58863	0.196058	2.0591	0.448739	1154.11	21.7585	1179.65	32.0227	1226.78	80.56	1226.78	80.56
standard	393.493	33180.2	3.6043	0.742347	2.88044	0.0911864	1.23603	0.429111	562.55	6.65853	563.774	12.4619	568.696	56.6375	562.55	6.65853
DE0540-DZ-46	704.213	11598	1.38642	0.192491	2.17838	0.0269059	1.45713	0.668904	171.154	2.46112	178.752	3.57043	280.424	37.0628	171.154	2.46112
DE0540-DZ-47	362.173	42423.7	2.49693	1.732	2.60787	0.172141	2.18656	0.838447	1023.9	20.7007	1020.49	16.7889	1013.18	28.8065	1013.18	28.8065
DE0540-DZ-48	640.115	35631	2.50433	0.900463	2.06226	0.106425	1.77347	0.859962	651.953	10.9967	651.975	9.92188	652.033	22.592	651.953	10.9967
DE0540-DZ-49	516.252	15494.8	1.91339	0.327464	2.03235	0.0460894	1.65668	0.815154	290.468	4.70531	287.628	5.09065	264.596	27.0203	290.468	4.70531
DE0540-DZ-50	354.825	59512.6	0.985054	4.19781	4.17122	0.277014	3.78169	0.906614	1576.3	52.8834	1673.59	34.2184	1797.83	32.0314	1797.83	32.0314
standard	552.123	45493.8	2.61706	0.729414	2.08825	0.0902567	1.6245	0.777926	557.055	8.66941	556.209	8.94331	552.729	28.6375	557.055	8.66941
DE0540-DZ-51	181.933	20617.1	1.07721	1.55684	3.10229	0.161077	2.66345	0.858544	962.76	23.8198	953.215	19.1825	931.225	32.6474	962.76	23.8198
DE0540-DZ-52	269.827	28098.3	0.922934	1.50299	3.3764	0.155313	3.08496	0.913683	930.677	26.7349	931.599	20.5892	933.759	28.1543	930.677	26.7349
DE0540-DZ-53	178.565	19421.2	2.0299	1.29158	7.96112	0.141383	7.1879	0.902875	852.479	57.3981	841.999	45.5913	814.443	71.5652	852.479	57.3981
DE0540-DZ-54	156.779	8289.74	0.311095	0.635167	4.04272	0.0813354	2.07662	0.51367	504.089	10.0692	499.309	15.9465	477.438	76.7006	504.089	10.0692
DE0540-DZ-55	387.268	20552.3	1.07575	0.708426	4.65328	0.0875995	3.51232	0.754806	541.325	18.2367	543.811	19.5948	554.227	66.6111	541.325	18.2367
standard	577.416	49939.7	3.27731	0.740038	1.73814	0.0912742	1.12888	0.649472	563.069	6.08666	562.428	7.50618	559.818	28.8102	563.069	6.08666
DE0540-DZ-56	65.7528	10529.3	1.66378	3.19509	3.49351	0.254621	2.90927	0.832762	1462.26	38.0617	1455.97	27.0232	1446.8	36.8348	1446.8	36.8348
DE0540-DZ-57	585.886	70842.5	1.79691	1.66597	2.95162	0.166158	2.7307	0.925154	990.91	25.0818	995.652	18.7306	1006.09	22.7323	990.91	25.0818
DE0540-DZ-58	348.088	32393.7	2.34494	1.74669	5.05778	0.1736	4.80722	0.950461	1031.92	45.8405	1025.94	32.6698	1013.2	31.8665	1013.2	31.8665
DE0540-DZ-59	151.46	2224.89	1.36584	0.127399	19.4129	0.0180907	7.7131	0.397318	115.578	8.8352	121.758	22.2781	244.194	413.256	115.578	8.8352
DE0540-DZ-60	316.906	70886	1.32685	8.05588	2.90876	0.366539	2.65865	0.914014	2013.1	45.9711	2237.31	26.2795	2449.31	19.9638	2449.31	19.9638
standard	291.239	33677.3	3.30133	0.757379	5.12308	0.0927749	4.94591	0.965417	571.927	27.0687	572.497	22.4223	574.738	29.042	571.927	27.0687
DE0540-DZ-61	147.737	12896.6	0.618453	1.10864	3.22184	0.123498	2.51362	0.780182	750.668	17.8118	757.52	17.2014	777.778	42.3835	750.668	17.8118
DE0540-DZ-62	149.608	14002.6	1.03025	1.27829	3.50618	0.136354	2.65113	0.756129	824.012	20.5071	836.094	19.9775	868.311	47.5645	824.012	20.5071
DE0540-DZ-63	63.3497	19880.4	1.16997	12.4664	3.02642	0.507491	2.43265	0.803803	2645.91	52.7935	2640.2	28.4553	2635.82	29.9097	2635.82	29.9097
DE0540-DZ-64	1055.2	25919.9	1.6374	0.314474	3.02547	0.0428641	1.65117	0.545756	270.562	4.37498	277.643	7.3496	337.722	57.4398	270.562	4.37498
DE0540-DZ-65	672.539	187315	13.3507	9.99016	1.82384	0.451699	1.52525	0.836284	2402.8	30.5939	2433.87	16.8355	2459.94	16.8993	2459.94	16.8993
standard	526.003	48087.7	3.22235	0.759343	2.35244	0.0927922	1.75011	0.743957	572.029	9.57985	573.631	10.3098	579.96	34.1514	572.029	9.57985
DE0540-DZ-67	120.1	17463.3	1.63104	1.66848	8.04163	0.16352	5.71114	0.710196	976.307	51.7424	996.607	51.0972	1041.53	114.337	1041.53	114.337
DE0540-DZ-68	141.059	63102.9	1.47754	15.2555	9.45863	0.538013	8.72599	0.922543	2775.13	196.834	2831.32	90.3709	2871.57	59.3521	2871.57	59.3521
DE0540-DZ-69	289.959	27700.1	2.2925	0.835105	3.80942	0.100132	2.67544	0.702323	615.183	15.6979	616.441	17.604	621.045	58.5153	615.183	15.6979
DE0540-DZ-70	119.056	50892.4	1.48812	5.84154	5.73589	0.359303	4.60472	0.80279	1978.87	78.467	1952.59	49.7682	1924.84	61.313	1924.84	61.313
standard	514.992	39487.8	2.9761	0.676581	2.41436	0.0855726	1.13302	0.469282	529.3	5.75746	524.706	9.8933	504.744	46.9153	529.3	5.75746
DE0540-DZ-72	169.858	48383.1	0.449586	4.97129	4.08085	0.325308	3.32895	0.815749	1815.6	52.676	1814.45	34.5103	1813.12	42.8804	1813.12	42.8804
DE0540-DZ-73	184.297	7880.7	0.572895	0.390646	5.21646	0.0518071	2.50994	0.481157	325.607	7.96957	334.841	14.88	399.471	102.517	325.607	7.96957
DE0540-DZ-74	952.648	33282.3	5.75622	2.67308	8.27655	0.194208	7.5726	0.914946	1144.13	79.391	1321.05	61.2332	1620.83	62.1759	1620.83	62.1759
DE0540-DZ-75	457.847	32404.6	1.95819	2.58167	7.05183	0.205165	6.22627	0.88293	1203.01	68.3312	1295.45	51.6561	1452.09	63.022	1452.09	63.022
standard	387.82	27758.4	3.06013	0.75478	3.3647	0.0930793	1	0.297204	573.723	5.48933	570.994	14.6962	560.125	70.0409	573.723	5.48933
DE0540-DZ-76	105.484	8902.21	57.204	0.85502	5.7427	0.0987777	3.68994	0.642545	607.242	21.384	627.4	26.8828	700.741	93.7353	607.242	21.384
DE0540-DZ-77	204.665	7258.29	0.970113	0.345528	12.8937	0.0429372	5.93054	0.459958	271.013	15.7394	301.352	33.6322	543.449	250.993	271.013	15.7394
DE0540-DZ-78	63.8421	5154.97	52.5292	0.720116	8.8748	0.0783254	6.16358	0.694504	486.119	28.8607	550.735	37.7427	827.791	133.325	486.119	28.8607
DE0540-DZ-79	89.2726	34460.3	0.797211	10.1731	3.6214	0.463469	2.70289	0.746367	2454.86	55.1817	2450.64	33.4922	2447.13	40.7906	2447.13	40.7906
DE0540-DZ-80	130.974	28061.1	1.00424	2.24465	3.54905	0.201952	1.51085	0.425706	1185.8	16.3645	1195.11	24.935	1211.98	63.214	1211.98	63.214
standard	568	45344.7	2.50012	0.730845	1.4369	0.0901147	1	0.695943	556.215	5.32895	557.049	6.16068	560.439	22.4906	556.215	5.32895
DE0540-DZ-81	307.845	42584.6	2.07384	3.68802	8.38637	0.232289	7.72257	0.920847	1346.48	93.8483	1568.78	67.0871	1882.22	58.9201	1882.22	58.9201
DE0540-DZ-82	264.075	60607.5	1.60171	4.65077	3.13976	0.312073	2.97612	0.947882	1750.9	45.6325	1758.43	26.2446	1767.38	18.2739	1767.38	18.2739
DE0540-DZ-83	215.085	3503.88	0.708182	0.167954	9.04111	0.021349	2.94893	0.326169	136.176	3.97362	157.642	13.202	493.725	188.716	136.176	3.97362
DE0540-DZ-84	980.462	21043.2	0.934901	0.172262	1.76493	0.0249967	1.43511	0.813124	159.158	2.25612	161.38	2.63344	194.091	23.8842	159.158	2.25612
DE0540-DZ-85	62.2269	18238	0.674912	5.19103	1.91455	0.330511	1.57879	0.824628	1840.86	25.2821	1851.15	16.3014	1862.71	19.5539	1862.71	19.5539
standard	593.273	54157.8	3.15775	0.73034	1.53955	0.0900043	1	0.64954	555.562	5.32296	556.753	6.59817	561.604	25.5098	555.562	5.32296
DE0540-DZ-86	796.894	237535	14.8902	5.02054	3.13981	0.327015	1.87295	0.596518	1823.9	29.7536	1822.79	26.5918	1821.51	45.7344	1821.51	45.7344
DE0540-DZ-87	467.204	5667.67	0.863251	0.142339	7.96166	0.0176423	2.71573	0.341101	112.738	3.03503	135.125	10.0734	549.076	163.642	112.738	3.03503
DE0540-DZ-88	196.313	49150.7	0.969424	3.11711	2.14464	0.250057	1.67414	0.780615	1438.77	21.5884	1436.92	16.4885	1434.16	25.5715	1434.16	25.5715
DE0540-DZ-89	149.805	62268.6	2.02983	10.4871	4.99525	0.469169	3.99404	0.799567	2479.92	82.2265	2478.78	46.3377	2477.84	50.6223	2477.84	50.6223
DE0540-DZ-90	213.825	41821.1	1.07142	2.35944	3.34889	0.205528	2.77109	0.827466	1204.95	30.4555	1230.41	23.8865	1275.3	36.6758	1275.3	36.6758
standard	250.68	30481.3	3.21934	0.779314	9.51803	0.0945741	7.13329	0.74945	582.532	39.732	585.092	42.3535	595.02	136.669	582.532	39.732
DE0540-DZ-91	258.323	74050.2	1.58536	8.91743	3.75654	0.396794	3.33963	0.889016	2154.26	61.1592	2329.59	34.3103	2486.95	28.9934	2486.95	28.9934
DE0540-DZ-92	336.328	58021.7	1.47116	2.76457	3.10507	0.234684	2.19088	0.70558	1359	26.8452	1346.02	23.1573	1325.44	42.6121	1325.44	42.6121
DE0540-DZ-93	232.676	56003.3	1.60739	4.56252	4.39945	0.312654	4.06186	0.923263	1753.76	62.3692	1742.45	36.6565	1728.89	31.0254	1728.89	31.0254
DE0540-DZ-94	124.651	17000.1	0.374127	1.99383	2.55533	0.181197	1.48167	0.579834	1073.51	14.6521	1113.42	17.2814	1192.18	41.094	1192.18	41.094
DE0540-DZ-95	156.286	4648.57	0.903603	0.259704	6.41825	0.035479	2.29864	0.358142	224.749	5.07716	234.428	13.4364	332.583	135.982	224.749	5.07716
standard	452.391	39721.5	3.46424	0.746491	4.04216	0.0915109	2.6854	0.664347	564.467	14.5135	566.186	17.5446	573.08	65.7223	564.467	14.5135
DE0540-DZ-96	323.879	117295	2.26831	5.26117	3.45763	0.337725	2.68373	0.776177	1875.71	43.6778	1862.59	29.5092	1847.95	39.4358	1847.95	39.4358
DE0540-DZ-97	270.989	37062	1.27211	1.8009	8.44638	0.161098	7.66856	0.90791	962.877	68.5914	1045.79	55.1976	1223.3	69.5816	1223.3	69.5816
DE0540-DZ-98	592.15	76172.6	5.13423	1.46474	2.55797	0.154267	2.06468	0.807158	924.838	17.7885	915.964	15.4365	894.628	31.1717	924.838	17.7885
DE0540-DZ-99	121.499	31026.4	0.313349	5.75247	1.47176	0.342265	1.07953	0.733497	1897.56	17.7451	1939.29	12.7316	1984.15	17.8024	1984.15	17.8024
DE0540-DZ-100	538.748	44347.7	0.752556	0.81603	2.06919	0.0986639	1.74581	0.84372	606.574	10.1067	605.831	9.44117	603.033	24.0355	606.574	10.1067
standard	532.169	58674.1	3.34514	0.70534	4.06578	0.0882822	2.76513	0.6801	545.37	14.46	541.976	17.0766	527.706	65.3413	545.37	14.46
standard	415.003	38773.3	2.72046	0.748311	3.31808	0.0931449	2.03311	0.612736	574.11	11.1676	567.244	14.4215	539.791	57.3618	574.11	11.1676
standard	234.784	28165.8	3.29736	0.808527	6.4516	0.0958336	5.16106	0.799966	589.946	29.096	601.627	29.2946	645.875	83.2045	589.946	29.096
standard	588.171	49906.7	3.22113	0.713807	2.14288	0.0885148	1.73976	0.81188	546.747	9.11987	547.004	9.0627	548.055	27.3254	546.747	9.11987
standard	450.697	40122.4	2.78822	0.750047	2.95317	0.0917262	2.17053	0.734986	565.738	11.7561	568.252	12.8523	578.305	43.5192	565.738	11.7561
1. Analyses with >10% uncertainty (1-sigma) in 206Pb/238U age are not included.
2. Analyses with >10% uncertainty (1-sigma) in 206Pb/207Pb age are not included, unless 206Pb/238U age is <500 Ma.
3. Best age is determined from 206Pb/238U age for analyses with 206Pb/238U age <1000 Ma and from 206Pb/207Pb age for analyses
with 206Pb/238Uage > 1000 Ma.
4. Concordance is based on 206Pb/238U age / 206Pb/207Pb age. Value is not reported for 206Pb/238U ages <500 Ma because of large
uncertainty in 206Pb/207Pb age.
5. Analyses with 206Pb/238U age > 500 Ma and with >20% discordance (<80% concordance) are not included.
6. Analyses with 206Pb/238U age > 500 Ma and with >5% reverse discordance (<105% concordance) are not included.
7. All uncertainties are reported at the 1-sigma level, and include only measurement errors.
8. Systematic errors are as follows (at 2-sigma level): [sample 1: 2.5% (206Pb/238U) & 1.4% (206Pb/207Pb)] These values are reported
on cells U1 and W1 of NUagecalc.
9. Analyses conducted by LA-MC-ICPMS, as described by Gehrels et al. (2008).
